# Supplementary material
Source: MDPI journal article supplement (https://www.mdpi.com/2073-4395/11/3/604)

**Supplementary Figure S1:** Chromosome-wise frequency distribution of minor allele frequency (A), gene diversity (B), heterozygosity (C) and polymorphic information content (D).

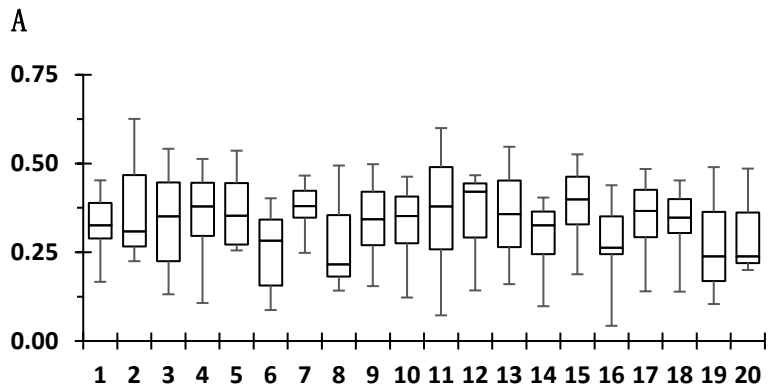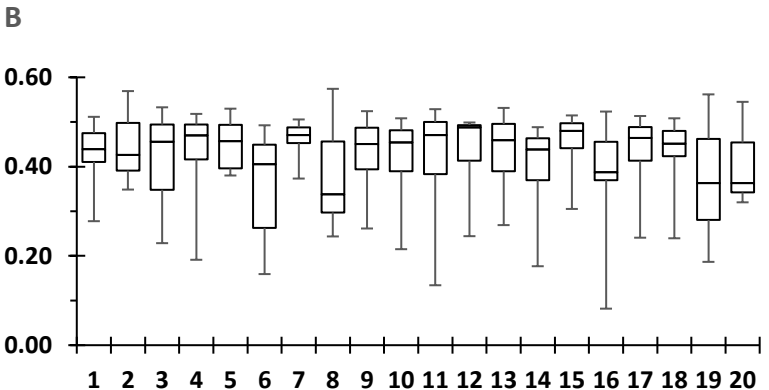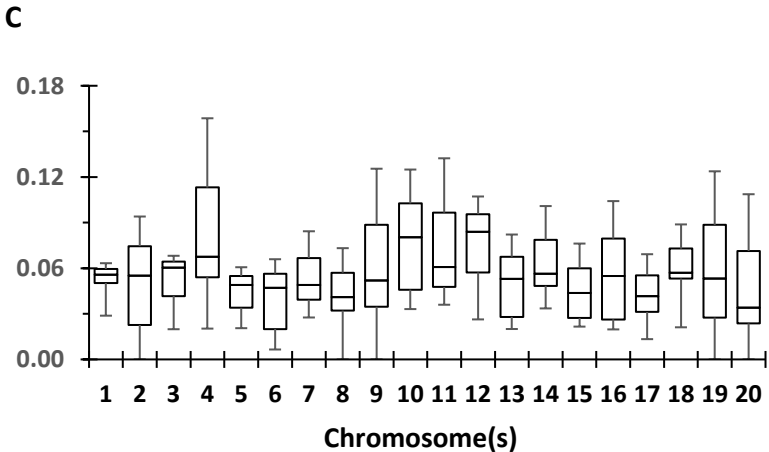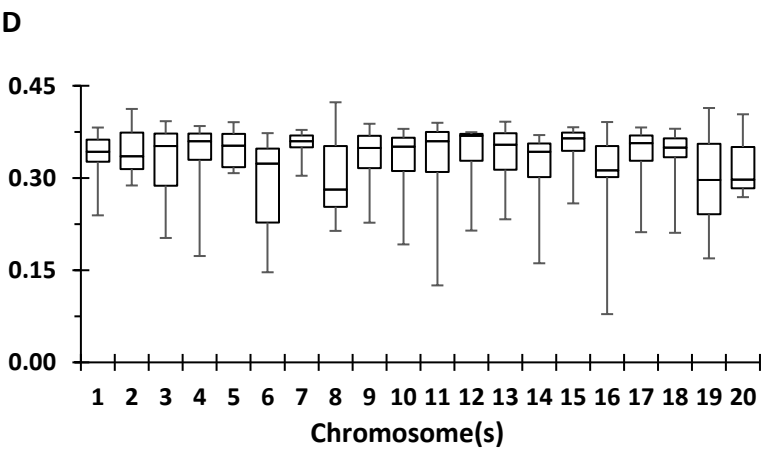

Supplement: s1 [file s1]
