# Supplementary material
Source: MDPI journal article supplement (https://www.mdpi.com/2073-4395/11/3/604)
Supplement: s1 [file s1]

**Supplementary Table S2: Details of KASP Markers used in present study.**

| SNP_ID            | LG | P (cM) | Alle | Allel | Dataset | Sequence                                                                                                                                    |
|-------------------|----|--------|------|-------|---------|---------------------------------------------------------------------------------------------------------------------------------------------|
| BARC-059889-16199 | 1  | 7.349  | T    | C     | GCP/IBP | ctaatttgtaRtacatggaagggaTCTAGTMCTCGAATT<br>TATAAGCATCGTACAAGAATG[T/C]TGAGATAAG<br>AAATATATGAAATGGAATAACAAAAAGTATAGA<br>CATGAAATAAGAGAATGC   |
| BARC-016475-02622 | 1  | 18.589 | T    | G     | GCP/IBP | GAAGCTTGCTCAACTCTTCGTCGTTCTCACC GCC<br>AATTGGATGTGGCGTGGAACAATTC[T/G]AGTCT<br>TCTTGTTATCTCTCGCAGCGTTTCCAGCCAATTCC<br>AAAACCTAAAACAATGTTCC   |
| BARC-060833-16926 | 1  | 37.143 | A    | G     | GCP/IBP | GTGCGCCCTCTCCGAACAYCTTCCCTCTTCTCCAT<br>GGCAGTGAATGAAGAACACTGTAGG[A/G]TAAG<br>AGATCTCGATGGCGAGAAAGGGAAAAGGTTTGC<br>GGTGATTCCGTGAAGTGTAGCAT   |
| BARC-059281-15709 | 1  | 40.869 | A    | G     | GCP/IBP | CTTTCTATAAARAAAATGGATGGTGATTGAGATT<br>GATTACCACGAGATAAATAATGCAYG[A/G]CGCT<br>AGCACAGTGATGGAACGACCTAACTAAGCATCA<br>GCCAA                     |
| BARC-065083-19095 | 1  | 45.576 | A    | G     | GCP/IBP | GGAAAGAACATGTTGAAKTATAAGGATCCTTTCT<br>ATGAATGTTAGAGGTCTGGGCAATCA[A/G]GTA<br>AAGTGTAGAGCAATTAGAGACTCGATTGCCAAA<br>GAGAGGGTACAACACTACTATGCTTA |
| BARC-024909-10358 | 1  | 54.864 | A    | C     | GCP/IBP | AAATAATCCTCGCACTAGAGACATTACTATACAA<br>TTACTATTAAAACTAGTTTTTCATGA[A/C]AAATG<br>CAAAAAATGCTTAAGTGGTGTAGAAAATTGTCA<br>ACCTGACATctggaTGT        |
| BARC-013211-00449 | 1  | 77.066 | A    | G     | GCP/IBP | TTTCTGGGACTTTGGATTGTCGATAAGTTGAACA<br>CACACGTATACATGTATTTAGTG[A/G]GATCAAA<br>GTAAACTTAAATGATCATACTTATCCTGTTGGATC<br>TGAAACAGATTGAAAAGC      |
| BARC-018211-03157 | 1  | 97.287 | T    | C     | GCP/IBP | AGACCAAGACTCCTCACTCAATTTAACAAATCAT<br>TGCACTCTTTAAAAATGCAAAACAAT[T/C]GATA<br>CAATTATCCAATAACAAAACACAAGGCTTYCATA<br>CCTCATTAGTCATGAAATAACT   |
| BARC-029431-06192 | 2  | 19.781 | A    | G     | GCP/IBP | TTGACTGCAAAATCTTGACAAGGGTTGGATCAG<br>AAATATCATGGCTAACCTTTTCGTAC[A/G]CAGC<br>ACTCCACTTCACCTCGCATCCATCGCCAATTGGA<br>GTCACTGAAATGTCTCCCTTGA    |
| BARC-020481-04638 | 2  | 25.115 | A    | T     | GCP/IBP | GTGTGTGGATATAAATATTTTACACTCTTCTCAG<br>ACGCTAGATTCTGTATTTGGATGAAA[A/T]TTTCT<br>TACTGAGGATTCTCTTAATATAATGTAAAATGTT<br>ACTCTCTAGAATTTATAGAAG   |

|                   |   |         |   |   |         |                                                                                                                                            |
|-------------------|---|---------|---|---|---------|--------------------------------------------------------------------------------------------------------------------------------------------|
| BARC-051039-10958 | 2 | 32.397  | A | G | GCP/IBP | TCATTGCAAATTTCTGTCCACAAGGCTTGTTGCTT<br>AGGTGGTGGTGAGGGTGATTGGGTT[A/G]TTCA<br>GATTCAGGTCATTAATGTTTGGGTTATGCACTTA<br>AATCACTTTTTAAAGAAATAGA  |
| BARC-063497-18380 | 2 | 44.461  | A | G | GCP/IBP | ATCATAAGGATCCTGTTGGTGTTTCATGATAAGGA<br>AGCTATGATGATTGATAGTGGACCGG[A/G]TAA<br>TCCTCAATAGGCCTTGGCCTCAATGATAAAGCTT<br>GATGATGCAAGGGATGAGGTGGT |
| BARC-048815-10726 | 2 | 66.176  | T | C | GCP/IBP | TTATGATTTTTGATATTTTTGTGTTCATGTAATGG<br>TGTATAACTGTTGTACATGTGGGGG[T/C]TATAT<br>GGTTATTGCTTCTACCAATGATG                                      |
| BARC-042403-08252 | 2 | 81.581  | T | C | GCP/IBP | GTATTGGGCAATCACCAAAAAAGTTTGGTGTGC<br>ATACCCAAAGATTTTAAGTCCTTACAG[T/C]AATC<br>TCATCAACGAGGATGAGGATGCACAACTACTT<br>GAAATTTGTGCAGAATGAGATGT   |
| BARC-030195-06829 | 2 | 85.835  | A | C | GCP/IBP | ATGTTTATGCTGTTGGTAATCCCTTGAGATCCAA<br>TGCCACTGTCCTTTATACCCTGTCAG[A/C]ACAGT<br>ATTTGTTAATAATAGATTGGTGATATAGAAAAAA<br>AATGTTTTTTTTTAGTTCGAA  |
| BARC-041581-08046 | 2 | 101.181 | C | G | GCP/IBP | ACACGGAAAATTATCATATCTATAAAG[C/G]GTA<br>AGAAGGGAAGACAGAAAATTAAACAGAGAAA<br>agGAGCATAGGCGCGATTTCAAACC                                        |
| BARC-046084-10230 | 2 | 105.034 | C | G | GCP/IBP | TTTTCTAGGGGAAAGATAAAGTGTCTCCTCTAAT<br>CTAATGGGTCATGAATTAATCTTGCA[C/G]TG TG<br>TGGTGAACCCAACAAAATTTTACGcataattttttatt<br>aaataaattattccaat  |
| BARC-016037-02043 | 2 | 119.19  | A | G | GCP/IBP | CGTTTGCTTTGCATTGCTGTCTGTSTASATCTTT<br>AATTATTTGGAGAGAGGAAAGA[A/G]TTCT<br>ACTCCACATGTTCCCTGTCCCCTTCTGGATCCTTC<br>CTTCTTTCTGTATACTTTT        |
| BARC-052165-11373 | 3 | 12.532  | A | T | GCP/IBP | TTCAAAATTTTCCCCGAAATATCAGCATGAACTT<br>GTGTTGTTTATTCTCTCTAAAAAAA[A/T]TTGTG<br>TTGTTTACATCTTACTCTGGCAAGTGAGTGGCAA<br>CATATAYACATGAAGAGGTTG   |
| BARC-048383-10556 | 3 | 32.618  | T | G | GCP/IBP | TTGCCAGTTAGCAGGGCCCTCAGGGAACCACAA<br>TGCAATTTCTTGTTAGCACTTTCAAC[T/G]GCAT<br>CACTTCCATGGATAACATTCTACACAAAGACAA<br>GTTCAATAAACAAAATTCAAAG    |
| BARC-063255-18278 | 3 | 37.468  | A | C | GCP/IBP | GATCCATTGAAATCCAAAAGTGGAGGAGCCAAT<br>GCTCATGAAGAGAAGCAGTAATTCCAG[A/C]TG<br>GTTCTTTGAAGGTAACATTTTGATGTTGGTTTG<br>ATCTTTATGTACACATAAAATTAC   |

|                   |   |        |   |   |         |                                                                                                                                            |
|-------------------|---|--------|---|---|---------|--------------------------------------------------------------------------------------------------------------------------------------------|
| BARC-050433-09624 | 3 | 44.989 | T | C | GCP/IBP | AATTAGAAATCATAAGTTAGAACTATATTCAGTT<br>AGGGAAGGGGGTAAACAGTTTACAAA[T/C]AGC<br>AGAAAATGTTATCCAAAAATACTGTGTACTTCAC<br>TACTTTATATGGTCATACTTAGT  |
| BARC-010179-00543 | 3 | 49.693 | A | T | GCP/IBP | GAATAAAGGTCCAARGTGAATTACTCTATTTAGC<br>TTCATGAAACATGTCAGATGACAACA[A/T]TTCA<br>AGTAATGTGATCAGAAAATGAAAAAGTGTATAT<br>AGCTTGATGATAATCTGTGTAAT  |
| BARC-023365-05350 | 3 | 60.667 | A | G | GCP/IBP | AAAGTTGAAGGATTA ACTATATACCATGTAAAA<br>GCCACCTACAGGTATAAACAATTTGC[A/G]TTGT<br>CTTCTTAGGTTTGTTCCTTGCGTGCTTTTGATGA<br>AATATGCTGCTCCATGAAATG   |
| BARC-047693-10381 | 3 | 67.505 | A | T | GCP/IBP | CAACACTTTCAACACATGGAAAGAGCAACATCAG<br>CATGATGAGAACAAACCCGGTGTGAT[A/T]GGG<br>TCCATGTTTAGAGCCGCCAAGGAAGCCGTGGTT<br>GGGAAGCCTCACCACGAGGAAGTT  |
| BARC-028539-05944 | 3 | 74.162 | T | G | GCP/IBP | CAAGCATTTTCATGCAATGCATGCATTAACAAAAT<br>TTTCTTTGAAAGGTTGTTTTTGCTC[T/G]GGTAT<br>TGAAAATTTTCCATTGTCAGGCATGTTGATCTTGT<br>TAACTAAATAAGCTATGGG   |
| BARC-044603-08734 | 3 | 85.822 | A | T | GCP/IBP | ACACTAATTATGGTAAAAAGGAAAAAAAAAATAA<br>TCTCATGGATAGGGATTACGATTTTCT[A/T]CAAT<br>TAATTATTTGAACACGGAAGTCTGAAGCTGTGTT<br>CTGGCTAAATAATTGTGGTTAG |
| BARC-028321-05831 | 4 | 4.856  | T | C | GCP/IBP | ATCCACGCCATTGTTGTTGAACACCGCACGGTCC<br>AATGCAAGCGTGCAAGCTTCTTGCCC[T/C]AAGC<br>ATTCTCGCTCCACGATTTGCTTGCTGGCAGCAGC<br>ATTGCAGCTTCCCATTGCAAAG  |
| BARC-057913-15004 | 4 | 10.044 | T | G | GCP/IBP | ATATAATCTTATAGGCTCTTAGCGAGGTATTACA<br>CTTTGGATAATTTGTAAAAATTAAT[T/G]GATG<br>ACATCATCGAAGAAGAAAAATTGTTTGTATGAAT<br>TTGTTTAAATTGTATTTTAATT   |
| BARC-022353-04316 | 4 | 16.715 | A | T | GCP/IBP | TAACGTGGCAGGATCAGTTACTGAAGAAGACGC<br>GGTTTCCGCAAGGTGGTTAGAGGGAGC[A/T]AC<br>CGTCACGCTCACGCTTCTTGCAAGAATAATGGGT<br>AAACCCGAATCGCTCAAATCGGAT  |
| BARC-031733-07217 | 4 | 19.496 | A | C | GCP/IBP | TTTAGCAGATGCAGTAATAGAAGCTCTCCCATCA<br>GCAACAGCAATATATGCACCGACCAG[A/C]ACCT<br>CTGAAGATGTTGATCATGACCCAGTTAGATATTT<br>TATCAAGATGTTCTTTGGTTCA  |
| BARC-044691-08761 | 4 | 32.272 | T | C | GCP/IBP | CATAGAGGTTATACGGAACCTTGCAATCCTAAAG<br>TAACTGATATCATGGGATTTAGTTTC[T/C]CCATG<br>GACAGCAAGGTCCGTCAATATCCTGCCAATAACC<br>GGAGCCATCTTGAAGCCGTGA  |

|                   |   |         |   |   |         |                                                                                                                                            |
|-------------------|---|---------|---|---|---------|--------------------------------------------------------------------------------------------------------------------------------------------|
| BARC-030073-06798 | 4 | 44.632  | A | G | GCP/IBP | CACACTACTCCAGCCATTCCCTGAATCACCAAAA<br>AGATATTCAGAGAAGTCATCTGTGCT[A/G]GTTG<br>AATCACGGGTGCTATCTGTACTACAAGAACCTTC<br>ATCGGAGTTGCTGCTGATAAG   |
| BARC-053219-11764 | 4 | 48.874  | T | C | GCP/IBP | ACTCCAATGTTTGAAATCTCTTCGTCTACATGATC<br>ATAGTCAACATTAACATTACCATTG[T/C]ATGTAT<br>CTCGTTCGTCTTCAATAATCATGTTATACAATATA<br>ATGCATGCCAATATAATAT  |
| BARC-016757-03361 | 4 | 51.445  | A | G | GCP/IBP | TTCATCTGTCTAAAATGTTGTTTTTGACAAGCAAA<br>GTAGGTGACACTCTTGTAAGCATCA[A/G]CAATT<br>AACACTTCTGGGGAAAAGTGTGAAACAGATGAT<br>TGTTTATGCTAATAATTAAAAA  |
| BARC-044523-08716 | 4 | 63.901  | A | C | GCP/IBP | GTTCTTCTACAACCGTGAAGATGGATTATTGACT<br>ATTACACTTGCTGGTGAAGGCAACTC[A/C]AAGG<br>ACATAGAATTTGTATACTGAGGTGAAGTCAAAGT<br>GAGTCTATTCCGATTCTTCTTC  |
| BARC-042189-08197 | 4 | 68.847  | T | C | GCP/IBP | AACACAAGTAATGCCCACTTTAGTCCATGAAATT<br>TAAGTTTAGTCTCTAGTTTTACCAAA[T/C]TCTCC<br>CTTGAGTCCCTATTTTAGATTTTTATAACACTAAG<br>AATTGAGATTCAAGAGAGAR  |
| BARC-013699-01240 | 4 | 97.433  | T | C | GCP/IBP | TAGCTTGGCCACAAAGGGTGTGGTTCACATCGAT<br>GTGATCATGTTGGCTCACAATCCAGG[T/C]GGGA<br>AAGAGAGAACAGAGAAAGAGTTTGAGGCTCTG<br>GCCAAAGGCTCTGGATTCCAAGGT  |
| BARC-061009-17004 | 4 | 104.605 | C | G | GCP/IBP | AAGGTATATTCCCATGTTTATACTATTTTATTCTC<br>ATGCTAAAGTCAGAAAGTTACGTTC[C/G]GATGA<br>AAAAGTGGAATTTATTTTCTAACCCACCAACTT<br>CCATTTTTTTTATCTTAAAC    |
| BARC-048987-10780 | 5 | 0       | A | G | GCP/IBP | AATCAATCTTGAAACCGAGTGCTGCTCCATGTAT<br>TCGGACATATCAATTCTCACCAACTG[A/G]TTTTC<br>ATTATCAAATAGTTGCTCAGCAAGAGCCTTTGCA<br>AGCTCAGTTTTACCAACACCA  |
| BARC-019415-03923 | 5 | 17.645  | A | T | GCP/IBP | TCATCTTTAATAACATTA AAAAGCAAGATGAACT<br>TCTTGAAATGACATACTAAATTTACA[A/T]GTTTT<br>TTAAAGTTTAAGGAACAAATTCAGTGATACAAAA<br>ACAGAGGGACcaaatttataa |
| BARC-040459-07745 | 5 | 36.095  | T | C | GCP/IBP | GTTCTCTTGACATCAACAAAGCCATTCCAGAA<br>GCAGCCATTTTTGGAAGCTCCAACCA[T/C]AGAA<br>TGATCACAGGTATAAAGACGTCTTTCAGAAACT<br>ACAAACTATTTGCTTGATAAGA     |
| BARC-042853-08438 | 5 | 49.474  | A | C | GCP/IBP | GtGTTGAAACGGAACCGAAATTGATCGTATTTCA<br>CTG[A/C]GTGGAAGGAGCGAAATTGAGAAGCTG<br>CTTGGAACGAAGCCACGGCTTCACCACCACAAC<br>G                         |

|                   |   |         |   |   |         |                                                                                                                                           |
|-------------------|---|---------|---|---|---------|-------------------------------------------------------------------------------------------------------------------------------------------|
| BARC-059081-15595 | 5 | 55.158  | T | C | GCP/IBP | TTGATCTCCATAAAATATATTATTGGATGTTGGA<br>ACAATTTTTATTGGTCGGATTTAAAC[T/C]TAAAG<br>ATTGTTGGTGCAAATTGGTGATGATGGTTCTACA<br>ACAATGAAGAAATACCAAAGA |
| BARC-047849-10410 | 5 | 65.734  | A | T | GCP/IBP | CACACACAGAGTATAACTGTYAATAATCAGTAAC<br>TGTAATCAAACCACTCCAAGGCCTAT[A/T]TCTTC<br>CAATTTTGAAACATAAACCAACTACAATCAGATA<br>GTCAAACCTATACGACACCAG |
| BARC-041257-07953 | 5 | 78.846  | T | C | GCP/IBP | TTCATAAGCGAATCAATTTGCCAGTTTCAAGTAA<br>GAAAATTATACTAGTCCCCTTGATTT[T/C]TCCAC<br>CCGTAACCACTATCAGTATGGATGCGGCATTGAAT<br>ATTTGATTATTTAGATAATA |
| BARC-015973-02029 | 6 | 6.108   | A | C | GCP/IBP | TTTTTTGTCATAAACATGACCAGGTAAGCATGC<br>TCTAATATCACTTCTTCCAACAGTTC[A/C]GCAAC<br>CTTGTTTCTGTATTTAGGAAATAATTCATCAATTA<br>TTCCTTCTCAAACCGTGCC   |
| BARC-064413-18929 | 6 | 23.207  | A | G | GCP/IBP | aaatattttatgatattttgaattttaatGGATTAATATCAT<br>AAGAATGTAAAGAAATT[A/G]AAAAGTTTTTATA<br>GGCACATGGTGTGTGT                                     |
| BARC-059985-16274 | 6 | 34.398  | A | T | GCP/IBP | GACAATAAATTTAAAGCATATATCACTTTCTTGCA<br>AATTCTTCTTTTAAAATTACGTTTT[A/T]AAGATC<br>GAATTTATCTAAAATTCTATTTGTAGATCTTAATC<br>TAACCCTATCTTGTCTAAT |
| BARC-040587-07787 | 6 | 65.67   | A | T | GCP/IBP | ATCTTTCCACTGATGTTTATAAATTTTTCAACCCT<br>ATTAAGATCCTAGGGTTATATCTAA[A/T]GTAATT<br>CCTCAATGCTGTAGATCTTTCAAAGCTTYAAACA<br>ACTATTACATAGTGATAGAT |
| BARC-024429-04882 | 6 | 70.92   | T | G | GCP/IBP | ACAACTTTTGTGGATTTACATCAAATATTTAATG<br>ATTCTCTATTCTAATTTTGATTTT[T/G]CAATAAA<br>CTTTAATCAATTACAGAAAATGTATTTGTAGCACT<br>GCTAACATTGCATGTTAT   |
| BARC-044133-08626 | 6 | 93.678  | T | C | GCP/IBP | AACTGAAACGGATCGGACCAAGATGCTTGATTC<br>CCCAGGAGGAGTTGTTGGATCTTGAG[T/C]AAA<br>ACCAACAAAGACCCTTTTCACTCCAACCAAAAAA<br>GCAACTAGGGTTCACTCATAAGC  |
| BARC-066175-19800 | 6 | 100.913 | A | G | GCP/IBP | AAAGTCAAATGTGTCCCTCCAAAAGTATAGATTA<br>AAGTAAGATATTAAGTTGAAATTGTA[A/G]ACAA<br>ACAAATATTAGGTTGAAATTTTACTACCAAGTAT<br>AATTTAAATGAAGCCTTACAA  |
| BARC-040475-07751 | 6 | 103.193 | T | C | GCP/IBP | TGTCCAAGGCCATGACCCAGAAATCAAGAAGC<br>ATGCATGTGACAAGAAAGACGGTGTTT[T/C]GTA<br>TCATTATGATCCCACAGCTTGCGCCGAAGGAGAT<br>GATTATAACGGGAATATAAATTA  |

|                   |   |         |   |   |         |                                                                                                                                            |
|-------------------|---|---------|---|---|---------|--------------------------------------------------------------------------------------------------------------------------------------------|
| BARC-059303-15722 | 6 | 106.362 | A | G | GCP/IBP | TTCTTTTTAGTATTATATGTTGGGTGATTACTGTG<br>AATACTGGTTAAATCTGCCATAATA[A/G]AACGA<br>AACAGTTATCTAATTTCCAATGAGAGATATTTTA<br>ATGAGAATGTGACACTATCTA  |
| BARC-038885-07387 | 6 | 114.129 | A | C | GCP/IBP | CAAATCTTTCTCACAACCTACAAGTTATCTTCTTT<br>GAATAGTAACACTTTTGGGGAGCCG[A/C]CACAA<br>AAGCCTAAGCTGAAGCTGAAGAAGGTTGCTGTT<br>AAGGTTAAGAAGATTGTGGCCT  |
| BARC-041427-07981 | 6 | 130.272 | A | G | GCP/IBP | GGACGAAGAACTTTGTTTGTTCCTACAATATTA<br>GTAGTTCTACTGAACTAGTCGACTCA[A/G]GTAG<br>GATAGTCTCTTTAATGACCAGGTGTGGCCTATC<br>CAAAAAAATTGTTAATTTGCA     |
| BARC-029825-06442 | 7 | 16.947  | T | C | GCP/IBP | CTTTTGTACTGCCATTGGGAAAATGGAGAAGGA<br>ATCAAGGCACGTATTCTCCAACAGTGC[T/C]TTTT<br>ATTAACAAGTTTCTATACGCTGATGTCAGGTGCA<br>ATCTAGGTTTGAGGTTGACATA  |
| BARC-900461-00929 | 7 | 39.074  | A | T | GCP/IBP | TTGAAAACGTGTTGTTTGAAAGGGAGAGAAAATA<br>CAAGAAAGGAATGTGACTACCAATGTC[A/T]ACT<br>GAGTTAATAGAGCTGAATCTATTGCTTGAGTAGT<br>CCAAGTAAATGGCATTTTTCAAA |
| BARC-044841-08824 | 7 | 45.128  | A | T | GCP/IBP | ACCCCTGCCAAAAAATTGATTGAAATGAGACAC<br>AAGCTAAAAAACAGGGCTGACATATA[A/T]AGC<br>ATGCAAACGTTCAAAAGTCAAAACACAAACGCT<br>GGAGGAAACTGCAAGTACATGGG    |
| BARC-016783-02329 | 7 | 50.249  | A | T | GCP/IBP | TCCATTTTCTGCGCAGTTCCACCATCACCAGC<br>CGACGCTGCAGTTCCAGCAGCAGCC[A/T]CAGCC<br>GCCACAGCTATTCCAGCATCAGGCACAGCCACCT<br>TCCCACCAACAGTTTCATCCT     |
| BARC-047995-10452 | 7 | 68.69   | A | G | GCP/IBP | ATCGTTGGAGGCTCTGCAGTTTCTTGAGAATGAA<br>CTACA[A/G]GACAAAAGGTTCTTTGGAGGAGAT<br>GAATTTGGATTTGTAGATATTGCTGGTGTCTTCA<br>TT                       |
| BARC-907715-01049 | 7 | 73.448  | T | C | GCP/IBP | AAGTATAAATTTACTTTCTTTGTAAAGTAATAATT<br>GTAGATCGTAGTGCTATATTAATAT[T/C]AATAG<br>GGAGGGAAATAAGGATCTAGCTCTCCTCTATAAC<br>AACTCACTGAACTAACTAGT   |
| BARC-007320-00155 | 7 | 89.837  | A | G | GCP/IBP | AGGACAAATATTGAAAGGTGATGATGCCAAAGT<br>TAGCATGGAAGAGAGAGCTGGCCTCAC[A/G]GT<br>TCCAAGGGCACATAGTCTCGTTTGTGTTCCAATT<br>GCAAGGATCGGCGTTGCATCTAAA  |
| BARC-065255-19294 | 7 | 98.539  | T | C | GCP/IBP | AACAATGTAAAATATGAATTTGTGTAACATAYGA<br>TTATAGCATTACCATTTCAGGGTAAA[T/C]TTCAA<br>TTATGTATGTACGACTCCTTAATTCATTACAAAC<br>TAAAGTTCCACCATCTTTCA   |

|                   |   |         |   |   |         |                                                                                                                                |
|-------------------|---|---------|---|---|---------|--------------------------------------------------------------------------------------------------------------------------------|
| BARC-021937-04237 | 8 | 9.566   | T | C | GCP/IBP | TGGGATCCACTCCTAATAGAGCTGGTGCATTTATTCGATATTATGCTTGACATTCCATGC[T/C]ATGGCAATATTTGGGATATGGGATCCACTCCTATGTTGTACATGATTGGTTTTTGTCT    |
| BARC-017665-03101 | 8 | 30.669  | T | C | GCP/IBP | CCGGTTCGACCGGGATCCGTGCCGGTTCCTATGCAACCCCTTATCACTACGTTCAACAA[T/C]CGTATCATGCTGTGGTGCCACCTCAGGTTCTATCGGGTACCATCCTTTGGTTCCGGGT     |
| BARC-040339-07715 | 8 | 46.979  | T | C | GCP/IBP | CGTCTTAGTAACCAATCTTTTCAGGTATATGGCCCATCTTTCTCTTGTCTGAACAAAAG[T/C]AGGGCTTTCAATACTAATTACCGCTAGATCATTTAAATACGATATATTTATGGTAAGTC    |
| BARC-027614-06619 | 8 | 56.878  | A | C | GCP/IBP | TTGMCGATMAAAAAAAAAACAAATGCCTAGGACTCTGCTAATTTGAGTGTAATAAGAGGAG[A/C]AAACTAAGAATGATTTGGGATGGGAAGGTTTTGATTTTCTCTGATTGCTACTTGGTAGAG |
| BARC-018941-03041 | 8 | 59.302  | A | G | GCP/IBP | ATGACTCAGGAAACCCATGGGGGAAGATAAAGAACATGCAAGAATGAGAACCTATCTTGT[A/G]GAGTTTATCTTCCAAAACATAATTCTCTATTTAAAGCATACATGACCAACCACAGAAGAT  |
| BARC-044663-08756 | 8 | 64.419  | T | C | GCP/IBP | GACTCGGATAGTAGCAGGRATGGACTACTTCCTCATCTTCAGAGCCAATGATGAGTACGG[T/C]GAATTTCAAAATTACGGAGCAACTGTGCGAGTAATCGAATCGCTCCATTCAGAAACCTC   |
| BARC-029669-06297 | 8 | 77.062  | A | T | GCP/IBP | CAACACAGCAAGGAGAAAAAAAAATAATCTTAGATCCTCCTAGCAAATTATCCAAGTTATT[A/T]ATTAGTCAAAATATTTTTCTTATGGCCAGATCCAATCTCATCCCTATGGAAAGGAAAAAA |
| BARC-054143-12351 | 8 | 88.163  | T | C | GCP/IBP | AATAGTCATCAATTTCTTASTGCATGTTGAAGCATTGGTGAGCTGAAGTTCTTGCCTTCT[T/C]GGGTACTATTTTATATCCAAATTCAGGATGTTAATTCTCAATAGGGGGATTGTAAATTG   |
| BARC-062129-17664 | 8 | 103.87  | T | C | GCP/IBP | TTGACTCACAAGGGCTTGCAAATTTGGGCTTAAGCCTAACATTAAGTCACTCATTTTATT[T/C]CAGCTTACGAGTTTATGGCCAACCATAACTTGGAAAAAGtaaaaatagttttttttaa    |
| BARC-042715-08379 | 8 | 124.403 | A | T | GCP/IBP | CTCTTGGTAATCTTCATTTTTATGGaccctttacctGTTCACTCATACTCTGGTTTAAT[A/T]GTCAAAAGCTTGCAATTCAGGTACTTCCTCAATCTGTTTGGATTAAAGAGGATTCTTAGT   |
| BARC-020591-04686 | 8 | 128.798 | A | C | GCP/IBP | GTTTGTAGCTTTGAACTTTAAAGTTGTCCGTAA TTATGTTTTTTATTTGTCTGATTGTC[A/C]TGCAGTGATAGGAAAAGATGGCTAAAAATGTCCATCCTAAGCACTGCAGGGAGTGGAAAA  |

|                   |    |         |   |   |         |                                                                                                                                            |
|-------------------|----|---------|---|---|---------|--------------------------------------------------------------------------------------------------------------------------------------------|
| BARC-054887-12192 | 8  | 136.308 | T | G | GCP/IBP | CACATCAAAGCACCAAGAAAGTTCGAAGTCAAG<br>AACAAAAGTGATATGATGCAATAATTT[T/G]GGT<br>GCAAAAACATGCACCATAAAGTTTCTGGGTACCA<br>TCGGTCTCCTGAATGGATCTCTG  |
| BARC-007972-00189 | 9  | 8.557   | T | C | GCP/IBP | CATTATTTATATTGGAATATGGACTATGGAGAAT<br>TAGTGGGATATTTAATTTCACTCTAC[T/C]TTGTG<br>TTTTTACAATCTGTGGATGCATTTTGGGGATAAT<br>GATTCGAAAGTGAAAAACATT  |
| BARC-028040-06720 | 9  | 23.81   | T | C | GCP/IBP | AATGGAGATTGTTTCGTGAAGTGAGTTATTACATG<br>TTCTTCTATAGGTTATATTAACATGT[T/C]TGTGA<br>AATTCAATTTCTAATTTCTAGTTCCTTGACATGAA<br>CTAGTATGCTTTTCATTTTT |
| BARC-028249-05804 | 9  | 39.511  | A | C | GCP/IBP | GAAATCGGGCACAAAATCGCCCGACCCGAAATC<br>CGAAAACATATCAGGGAACGACCCAGT[A/C]ACT<br>AATTCGGCGTCGGTGC                                               |
| BARC-007999-00186 | 9  | 57.208  | T | C | GCP/IBP | CACTGGTATGACAGCATTCTAGTGGTGGCTACKA<br>TGGTGACACTAATAAACATCATGGAA[T/C]TACT<br>GGTGGCTATAATGATGACACCAATAGACATCAT<br>GGAACTACCGGTGTCTATSSTAT  |
| BARC-030181-06822 | 9  | 74.562  | A | T | GCP/IBP | GGAAGGGTGCCTATTACATCAACCAAGTATTAG<br>TTAAGAAGATGAACCTTCCATTAAA[A/T]CTGTT<br>TGGCACCCCTTGGTTTTCTATGGAGAGGTAATTT<br>AAATACAGTTACTTACACCCG    |
| BARC-030025-06777 | 9  | 84.99   | A | G | GCP/IBP | ATAAGATTGTGGATGAATGGAGGCCATGGAAC<br>CAAATAACCAAGTTGCTGGGTATGCAT[A/G]TCA<br>ACCCTCTATGCCTAACAAATTCTTGACTTGTATT<br>AGTAAAGTTGTTCAATTAGCTA    |
| BARC-060183-16458 | 9  | 89.402  | A | T | GCP/IBP | CTTCAGAGTTCTATAATTGGACATTTTCAAATAA<br>TAATCTCAAATAAATTTATCACAA[A/T]CCAGTG<br>AACCAACTTAACTATCCCAAGAACAAAGCGCAA<br>AGGATATCCACATTACATC      |
| BARC-051769-11236 | 9  | 93.79   | A | G | GCP/IBP | CCAATTTATGACTTCTTTTGACAGAAAAAAGAT<br>ATTTGACTAGACAGAAAAGAGGGAAA[A/G]GAT<br>ACAAAATGGTGTGTATGAACCAAGGTGCTAACTT<br>TATCAGCTTAATTACATAATTC    |
| BARC-018101-02517 | 10 | 10.747  | A | G | GCP/IBP | CAACAAGATAAAAAAATTCAAAAATCAGACTATA<br>TATACCCGTCTATTGCCAGAAACAGT[A/G]TCCA<br>TAAATAATGTTTTGCTGACAAATAAGTGAATAAC<br>ACAGCAATATATGTTATTTACA  |
| BARC-018911-03277 | 10 | 25.524  | A | G | GCP/IBP | CACAATAAATCTATATTAGRGATTTAGCAATGCA<br>GGAATCAAACCAATGACAATTTTGGG[A/G]GTTT<br>AAGTTGATCGAATAATAAGGGATTTACCAGCAG<br>ACAGGTAACACAATGCAAAGAGA  |



|                   |    |         |   |   |         |                                                                                                                                            |
|-------------------|----|---------|---|---|---------|--------------------------------------------------------------------------------------------------------------------------------------------|
| BARC-035255-07160 | 10 | 41.762  | T | C | GCP/IBP | TGAAAGTACAAAAAATGATGAGTAGGAATAGCC<br>CGAAACAGATCATATTAATATTTAAAC[T/C]AAA<br>TTGCATACTCACTATTTGTTAACACCTCTTCAGA<br>CTCTCCTCAGCATCCGTTTTAG   |
| BARC-051149-11016 | 10 | 47.348  | T | C | GCP/IBP | TAAAGTAAATTAATGAACAATGGAAGGAAAAAT<br>GTAATGATCCAAAAGCACATATTCATC[T/C]AGA<br>GGTCTTATAAAGTTAAGCATATGCACTAGAATAA<br>GTTCAAGTTAATCCACAAACTGTT |
| BARC-040749-07839 | 10 | 66.854  | T | G | GCP/IBP | GTCAATTCGTCACTCACTTGAGGCAAAAGAGATC<br>GTGCTTTGACTATGGATGAAAAACCA[T/G]ATTG<br>AATGTTTACATTAACGACGTATAAATAATTGAAC<br>AAATTCCAACGCAAATACCATC  |
| BARC-029491-06207 | 10 | 82.103  | C | A | GCP/IBP | TCTGGAAATGTGAAAGAAATAGAGACAAAAATA<br>TATTTAATTGAGACAAAAATGCACTTT[A/C]ATTT<br>CAGTCTTTTAAGTTAGTCTCCACTCTTATGTTTAA<br>TTTTCATTCTACTCCCTAAA   |
| BARC-050013-09288 | 10 | 94.973  | A | T | GCP/IBP | CATTCCAAGACTCCTCTACATTTTGAAACTCCAA[<br>A/T]TAATTTATCTTCAAAAATTCATAAATTTAAAT<br>GACTCGAATCTTGATAGTTATAAATATT                                |
| BARC-065783-19748 | 10 | 117.856 | A | G | GCP/IBP | AGTCCCTTAGGGCAAAACCAATTTTCACTACAAA<br>CACCAAAACAAATTATTCAAAAAGAAGG[A/G]AACC<br>TACTGAGCAGTGCAAAAAACAAATGAGAAATT<br>TTTTCAAAACTCAATCTGAACAT |
| BARC-041591-08048 | 11 | 5.575   | A | G | GCP/IBP | ATATAGCATTATAGTATTCATCGTAAGCTAGGT<br>CAAATCGTTATTTAACACAGGTCTTC[A/G]TCCAT<br>CTTTGTTATTCCTGTCAAATATATATTCCCCGAT<br>TGAAGACTATTGCTGCATCC    |
| BARC-041095-07905 | 11 | 23.856  | C | G | GCP/IBP | ATTTAATTGCTAATTATTGTTTAACTTAACATGTT<br>GATGAAATACTGATTTCTCCAATA[C/G]TGAAC<br>AAACAAAGAAATCTTGAATTTTTCTAGTGATCTA<br>CCCTACTGCGATATCCTTTTT   |
| BARC-016539-02087 | 11 | 45.398  | T | C | GCP/IBP | GGCCCCGCTGCAGGCAAAAATGGACATGCTTCT<br>ACAAAGAAAACCTCAGCCAAGTGAAAG[T/C]TCTG<br>ACAGTGATAGCTCTGATTCTGATAGCAGCTCTGA<br>TGAAGGCAAAGTAAGTTTTTTT  |
| BARC-032817-09052 | 11 | 55.573  | A | C | GCP/IBP | AAGAAAAGCAAACCTTGACATTATCGTTGTTCTTT<br>ATGACGGCTAAAAAACTAACCACGAG[A/C]GTC<br>ACTGCAGTTTAAACTGTCCAAGTATGCAGAGCTA<br>ATAGACATACATATCCCACTTGA |
| BARC-040309-07711 | 11 | 69.17   | A | T | GCP/IBP | TGACTCTAAAGCAGAACAAGCAAAC[A/T]AGTTG<br>CAGAGTCTACCTTAAATTCCCCAATTCCCAACTTT<br>AAGGCCAGCATTGCTCAATA                                         |

|                   |    |         |   |   |         |                                                                                                                                             |
|-------------------|----|---------|---|---|---------|---------------------------------------------------------------------------------------------------------------------------------------------|
| BARC-050205-09457 | 11 | 76.856  | T | C | GCP/IBP | TTTGGGCCACCTCTCAAAATAGTCG[T/C]AGGTT<br>CCCAAATACCTTCATCCATCTTTTGTGGATGAGA<br>ATAGCTAACTTTTCCATACA                                           |
| BARC-042299-08241 | 11 | 92.47   | A | G | GCP/IBP | AAATATTGATAACTCTTAGCCTAAGATTATTACTT<br>TGATTTAGGTCAAACTTGTTAGAG[A/G]ATACA<br>ATTGAAAGAAAAAATAATAAGTAGCAAATAGGA<br>TAAATATACAAGGTCAGAATAA    |
| BARC-054049-12291 | 11 | 101.754 | A | G | GCP/IBP | CAATTTTATGTATGTGAATGTGAAATAGTGGAGG<br>GGTGGTTAAAGTCAACTCTTGGAAGT[A/G]GAT<br>GAAGGCAAGGAGAAAGGGTTTTGTTTATAARAT<br>GTCTTGGTTTTTAAATCCTGCGGC   |
| BARC-054037-12260 | 11 | 110.289 | A | G | GCP/IBP | ATGATTGCAATTGCCAATTATTATTGCTCAGATA<br>GGAACATCGATGTAACCTGATGGTCA[A/G]TTGA<br>TCATCAATGTCTCTTATCTTGGCTGCTTTAGTTTG<br>TTTGCTAATCTACTATTAATT   |
| BARC-020149-04485 | 12 | 6.175   | T | C | GCP/IBP | TCCTTCTCCCTTTTCTTCTCAGCATCCCCACTCTG<br>CACCTGAAACGTGTACTT[T/C]CTCGAGCTCCCAC<br>TCTTCTCCCTTTTCCCGTGATCTCAGCCGTCCAT<br>TTCACGTTCTTG           |
| BARC-027560-06613 | 12 | 9.802   | A | G | GCP/IBP | ACAACAACAACAACGGGCCCCGTTAGGCCCGTCA<br>TGAATAAAAAAAAAAAGTTGCAACAACA[A/G]CG<br>TACTCATTTTCAACCCCATGATGTGCGAAGTGGT<br>ATTGACAACGAATTTATGATTCAC |
| BARC-053059-11707 | 12 | 15.72   | A | T | GCP/IBP | CAGAAAATGATGTCTGTCTAATAATACCTGGTAT<br>GTGGAAAGCCATTGCTTTGTTTTT[A/T]TGCTC<br>CACAAACAAATAATATACCAAGTGATGTAAAAAA<br>CTTGTATGAGAAAGAAAATTT     |
| BARC-052799-11625 | 12 | 31.367  | A | G | GCP/IBP | TGTGGCATGTTGGCAGCTCATTGGAAGCAGTTA<br>ACAGAATTTACGAGATTAAAGGCCGTA[A/G]AC<br>ATACAAGCCCTCTGGCTAKTTGTGTTGGTGACGT<br>ATCAGATATAGCCCGTTTTGCTGT   |
| BARC-030145-06814 | 12 | 33.888  | A | G | GCP/IBP | CTAGGTTTTACCATTTCCAACAACAACAATGACA<br>ACATAACTAGCAAAAGGTCACATCCC[A/G]AATG<br>TTCTGTTGTAAAGATCCCCAGAATTTGGCATCCG<br>AAATTTTGaaTCATCATATCCT   |
| BARC-032147-07327 | 12 | 52.74   | T | C | GCP/IBP | GATCCCTGAAAGAGTTGAACCAGGTAGAGATAA<br>AATGATGATGGAGTAATAAATAGTGTT[T/C]TGA<br>GCAATGGATTTTGGATTAgttgtgtgtgtgttattgt<br>tTGTGACTGATTGAGG       |
| BARC-050237-09522 | 12 | 58.343  | A | C | GCP/IBP | TTTCTACATCCAAGTTGTGAACCTTCGGTTCAGAT<br>GTTCAATATGCAGCACCAAAATATAC[A/C]AAAA<br>AAAAGTAGTACAATAACAAAATAACAAAACACA<br>AACAGAAACAAGAAGATGGTTTG  |

|                   |    |         |   |   |         |                                                                                                                                           |
|-------------------|----|---------|---|---|---------|-------------------------------------------------------------------------------------------------------------------------------------------|
| BARC-061985-17608 | 12 | 62.138  | T | C | GCP/IBP | GATACCAAATGATTGAAMAAATGGAACATACAC<br>TAGTGACTTCTACAAGGAGGTTGCACC[T/C]ATA<br>CTTCCAAAGTCATTTGATCAAAGTCAAgacaACC                            |
| BARC-050003-09283 | 12 | 78.391  | A | T | GCP/IBP | ACTTTGAAGAATTCAAGCTTCAAGTTCCTTAAAG<br>SGGTTGAGTCTTTGGCTTCAATTACC[A/T]GTTTC<br>AATATTGGCATTGCTTCGTTTGTTAATTTGACGTT<br>GTTCTTGGTTTGAAGCTGCA |
| BARC-049209-10821 | 12 | 83.151  | A | G | GCP/IBP | CACTTATTCCATCGCACATACAACAACCATACCAT<br>ACGGGATCACTCATATGTA[A/G]ACAGACACCAC<br>ATGGCATAGCATAACTAATAAAAAAACATGGCAT<br>AGCATAAATAACCAA       |
| BARC-039237-07479 | 12 | 101.092 | A | G | GCP/IBP | AACAAAACAACATCAATGCATTCAAAATGATAGG<br>ATGTTATCTATCCACTCTTTTGAGAC[A/G]TCATT<br>TTCTTCTCCATGCAAGTGCAAGGTCTCTAGAAC<br>AACATGGGATGTTGGAGGCTC  |
| BARC-019821-04399 | 12 | 106.142 | A | G | GCP/IBP | GATGCATAAAAATTAAATTTAAAAACTATTACAT<br>CTTATAGAAGCCATGCACGGGTTGAT[A/G]CTGG<br>AAAGCTGATTGATGTTTACTACATTTCTTTAGGA<br>AATGAATAGGTCTCTTTAAATA |
| BARC-035375-07174 | 13 | 19.184  | A | G | GCP/IBP | ACTTAGTTTTCTTAGCAACTTCCACCGTGATCCGT<br>AATGAGCAAACACCATATCCTGTCA[A/G]CAAGG<br>ACGGATCCAAAATAGCCAAAAGTGAAAAGATAT<br>ACATATGTTATTATCTTAGTAA |
| BARC-014411-01355 | 13 | 28.209  | A | G | GCP/IBP | TATTAAGTCAGGTACCAGAAAATTTGCATCAATT<br>CACACTCATGAGTCACCTGAACAAGA[A/G]CTAG<br>ACCYGGTTTTATTGTTTGTATCACTGTATGTAATA<br>TTAATGTTTTCGGTTCATAC  |
| BARC-038405-10071 | 13 | 34.457  | A | G | GCP/IBP | GAAAGTGGTGTAATTGTTCTCTCCACTCCTGTCT<br>ATTACTGTACTATTTAAG[A/G]GAAGCACTGTA<br>CAGTATACCTAGAAGCCCTACAGGTATTTTCTTA<br>ATCTGGTTTCTGCA          |
| BARC-050657-09804 | 13 | 45.033  | T | C | GCP/IBP | TAAAGGGCGGTTCAATCCAGGGTCATTTTCAAAA<br>TCCCAACTTACACCTCTATAAATGGC[T/C]ACTCG<br>TGCCCCTATCCTTTTCTCGCATTCTCTCAAAAGT<br>AAAAGAAAACCTCTCGTTTT  |
| BARC-038413-10074 | 13 | 50.707  | A | C | GCP/IBP | GCAATCTACTGCAGTTGAATCAACTAGTAGGTTT<br>AAGTTCAATAGTCATGTTAAAAAAT[A/C]TAGG<br>CTTGAAAAGATCATTGCAGATAGAAGAAAAATAT<br>ATAATTGATTTAGAGAATGAATC |
| BARC-041649-08056 | 13 | 68.55   | A | T | GCP/IBP | TTATATGACTCCAACCTTAAATCTCACTGAAAGCTT<br>GATTTGATGCTACCCCAAAATACAC[A/T]CCCTCT<br>TTCCCCCATGCCATAACATAAAGTA                                 |

|                   |    |         |   |   |         |                                                                                                                                             |
|-------------------|----|---------|---|---|---------|---------------------------------------------------------------------------------------------------------------------------------------------|
| BARC-028583-05961 | 13 | 75.921  | A | T | GCP/IBP | ATGTCCATATCTCTTTAGTAATTTTTATAGGATCT<br>AAATGGTATAGCCACTCATTAAATCT[A/T]TACCAT<br>AATCTCTTTGTAAGAAATTAATGAATCAGTGAGA<br>AATTTAGTTAGAGGTGACAA  |
| BARC-046144-10286 | 13 | 85.177  | A | G | GCP/IBP | TGTTTGACATGTTCCATGTTCTATTATATATACT<br>CCATTTGTTGAGAGCATTTTTATTG[A/G]CATAAC<br>CTTTGTCTTTCTGTTCAAGGTATGCTGATGTCTAG<br>TTCTGGTTATGGGTAATTG    |
| BARC-042953-08476 | 13 | 102.161 | A | T | GCP/IBP | GCATGCATATAGTACAGAATAGTTGTTCACTAAT<br>TGAGTTTTCATTTTCCAACCAATAA[A/T]GATTY<br>CTTGCAAGTATATTAGGATCAGCAATTTCAATTT<br>ATGAATTATGATGGGTGCTC     |
| BARC-013365-00489 | 14 | 3.28    | A | T | GCP/IBP | ATCAGAAAGGTTTCATCTCTACTTCTGATCACGCCA<br>CTCTTCCCAAAACCTACCACAGGTCC[A/T]CACCT<br>CAAGTCTTCTCATAATTCCCTCCACATTTCTCAAT<br>GCTTCCTTCAAATAATTTAC |
| BARC-020561-04671 | 14 | 14.853  | A | T | GCP/IBP | GactgATAGGCCCTTCAGCTGCCCTTTCACCGGCG<br>TTTTGCAGGTTTCACATTATGATT[C/A/T]GGCTTA<br>GGTTCAATAACCAATTAAGATGAGGGTTTGAG<br>TTTCTCAGGATAGTCTCAGCT   |
| BARC-044973-08857 | 14 | 25.48   | A | T | GCP/IBP | TTCTGCTTTATTGCTGCTTGGGTTTGAACCATTCA<br>TCACAGTTGAATTGCTTACAATCTT[A/T]GTTTCT<br>TTCGATTCTGCCCCGAGATAAAtttgacAA                               |
| BARC-044549-08718 | 14 | 40.026  | T | C | GCP/IBP | GCTCAATTGTTTTTTTTCTTTGGCTCCAGGCTG<br>CCCAGGAAAGCAGAAAGTTTCTCCT[T/C]CCTGT<br>TGGAATATCTTTAAATTTTATTTAATAGCTGATAT<br>TGCTACCAGTATTCAGAAAT     |
| BARC-064873-18956 | 14 | 45.456  | A | G | GCP/IBP | CCAAAACAGAGGAAAACCTGATAGGAATAAGAAT<br>TCATCTTCCAAGTGGGATAGGCCTTTT[A/G]TGA<br>CATATCAATGAAGGCCTAAATAGTATGGGACCTA<br>ATAATATCTGTTAGGGGAGAGTC  |
| BARC-054615-12115 | 14 | 56.097  | T | C | GCP/IBP | GGTGTGAAACTCGTAGCCTCCAACCTAGGATTCTT<br>CTCGCAAGTGTCTTTCCAAGTGAATC[T/C]TGAG<br>AAGAAGTTATGGTTGACGATGGAAGCTACGGGC<br>GTTGCGAAAACCCGCAAGTGTCGT |
| BARC-052789-11619 | 14 | 65.173  | A | G | GCP/IBP | CTGTCAGGAAAATAAATATTGGGGCTAAAATAG<br>TTAAGGAAATTTAGTTTCCCT[A/G]CGTGACTTT<br>GATATGTACCAATATATGAATAAGTTTGATCCAG<br>GAACAAGTTGTTTACAA         |
| BARC-013273-00464 | 14 | 80.364  | A | C | GCP/IBP | CTATAAACTATAAAAGCTTTGCCCAGATGAARTT<br>ACACTGCAGGCAAATTTTTCATTAC[A/C]TTTAG<br>CTTAGTTATCTTCATTGTCGCCCAAATTATTCTTT<br>GTCACATCTTTGTATTAGCC    |

|                   |    |        |   |   |         |                                                                                                                                           |
|-------------------|----|--------|---|---|---------|-------------------------------------------------------------------------------------------------------------------------------------------|
| BARC-039667-07536 | 14 | 86.643 | T | C | GCP/IBP | ATTGTACGCAGCCTTACCCTTGCATATGCAAARA<br>GGCAGTTTCTGGATTCAAACCTATGC[T/C]AAGT<br>TAACAGACTTGTTTCAGGAAAAACACCAAGCCAA<br>ATTCAGTTTTTCAACCCTTCTT |
| BARC-031363-07063 | 14 | 97.126 | A | C | GCP/IBP | ACTTGTCAAGGATCAGGAATTCAACCTCGTTACC<br>TTGACCGCAGGTATGGAATTCTGCAG[A/C]CTAA<br>ATTTTCCCCTTTGTAATTTAAGACAAAATTTATAT<br>ACAGTTCCTTAGTGCTTTCGG |
| BARC-025493-06513 | 15 | 9.972  | A | G | GCP/IBP | ATCTGATGAGGTGTACCTTGGGGAGAGGGACAA<br>TCCAAATTGGACATCTGATACAAGAGC[A/G]TTA<br>GAGGCTTTTAAAAGGTTTGGAATAAACTGGCA<br>CAAATTGAGAATAAACTCTCAGAG  |
| BARC-039687-07541 | 15 | 18.773 | A | G | GCP/IBP | GACCAGAAATATCTCATTCTGAAAATTTTCACGTT<br>AAGTGACCAAAAAACAACAGCAATG[A/G]TATC<br>GTATATTGCTCCCCTAAGGATAACTTATAATCGTT<br>ATTTATAACAAAAAAGAAAA  |
| BARC-041187-07932 | 15 | 31.257 | A | T | GCP/IBP | AAACAAGTATAGGCATATTACAAGGCATGCCCCA<br>AATAGCTACC[A/T]ATCTATTTTTTCTTTTGGTTT<br>TTCTAAAATCCAATTAACACGGTTCAAAACACCG<br>AAAA                  |
| BARC-018901-03270 | 15 | 47.292 | A | G | GCP/IBP | AACAACTTTTCGCATATTATACATGGAAGGAATC<br>ATTTTTTGGTCCAAGGAAGAAAGCAC[A/G]TGCA<br>AGAGGGGTCTGGCGACAATAAGAGAGCTACAA<br>TTAGCGATAAAACCACCGAGTGT  |
| BARC-050109-09389 | 15 | 54.942 | T | C | GCP/IBP | ACAAGAGAACGCAAAGACGAAAGTTTGACATT<br>GGAGGTGAAAATATGAGGAAAGCACA[T/C]AA<br>ACTCACTCACTCACAAGCTTACGCAATAAATCTC<br>ACCGTCGCATGACACAGTAACTG    |
| BARC-066103-17539 | 15 | 66.033 | A | G | GCP/IBP | ATCTAACTTTCAATCTGTAAAACAAATGTACTCAT<br>AAGAACTATTATCATAATAAGTAT[A/G]TGAAT<br>TTTTCTTTTCACTTCTGTGTAATATAAAGGTATAT<br>TCAGAAAATTTTCTAAAT    |
| BARC-054787-12166 | 15 | 75.942 | A | G | GCP/IBP | AGATCGGGAAAGATTATCCAACATAGGAGAART<br>GGTTAGAGTATATGGGGTAAGGGTTTC[A/G]AT<br>TTGGATGGTGGGGATGAGTGCAACTTTTGAGGA<br>GGGAGGGGAACTCAAAGAGATTTTT |
| BARC-057969-15031 | 15 | 77.038 | A | G | GCP/IBP | TTGtacaAATAAAAGTAATAATAATTGTACAAATA<br>ATTCATCCTTTAGCAGAATGGCATA[A/G]GGGAC<br>GAAAAATTGGTAAAACCAAGGTAGATGGTTAGG<br>GGTGTAAGCCACGGACTCTTG  |
| BARC-057281-14664 | 15 | 93.739 | T | C | GCP/IBP | CTCTTCTTTGGAGCATTAAAGAGTTCATCAAAGAG<br>CATCATGAAATTAAGTTAAAGCCTTC[T/C]AAGT<br>GAGAGAACTCAAGCCAAGTTCTCTGTGTGAAA<br>AATTTGTCATTATTGCCTCAACC |

|                   |    |        |   |   |         |                                                                                                                                            |
|-------------------|----|--------|---|---|---------|--------------------------------------------------------------------------------------------------------------------------------------------|
| BARC-016027-02038 | 16 | 2.336  | A | G | GCP/IBP | CATTTAGATTTAAGACAAGTGAGTAAATCTGGTG<br>TCATTCACTCCTGTATATGCTAAAAT[A/G]GCCAC<br>TACCATTGTTGTTTTTGGTTACAGAATTTGCTTT<br>ATAACCCCTGACCCACATCA   |
| BARC-028006-06717 | 16 | 11.362 | T | G | GCP/IBP | GTGTTGTA CTCAATGATGAGATGTCTTTCTTGTA<br>CAGAGCAACGCCTAGGGAGCTTCATG[T/G]CTTC<br>TGCTATTATGTTGATCATTTTCAACCATATGGGCA<br>CTSTAGATGCATARAAATGCC |
| BARC-030595-06910 | 16 | 23.797 | T | C | GCP/IBP | TTACATGCAGATTATCAAGATGAACTATAATTCT<br>AATCGAAGAATAACACCAAAAATACC[T/C]ATAA<br>AACTAAATCAAAGTTTTGTGGTTTAACAAATGAC<br>ACAGGCATTGGGATTCTCTTCC  |
| BARC-031525-07106 | 16 | 34.782 | T | C | GCP/IBP | TAAAGCCTTCAGTTAATTCTTTTGCTGATCAACGA<br>TAACCATTCTTGTTTACTTATGTGA[T/C]TGGTCA<br>TGTTGCTTTTCTTCTCGGATGCATATAAATGTGAA<br>TCCTTTTCTCACGATGTTG  |
| BARC-059867-16171 | 16 | 46.048 | A | G | GCP/IBP | ATTAAAGATTTCTAATTATTAGAATATTTGATACA<br>AAATTATTTGTATTGCTCTTGGGGT[A/G]TTCACA<br>CTAAAGATTTGGAAGCCAGATTTGAACATGGTCC<br>GGGGGTTTGTTTTCATATAT  |
| BARC-031917-07226 | 16 | 60.927 | A | G | GCP/IBP | ATTAAACATGTGTCCATTTACCTCAAATCATGTTA<br>TCCGATATTTCAACAAGACTTTAAA[A/G]AATCCT<br>ACGTGAAACCAAACATGCACTTActaGAAtAAGC<br>AGAGTGAATAGCAGAAATAC  |
| BARC-011645-00322 | 16 | 67.895 | A | C | GCP/IBP | AGAAAATGTAGYCAATTAATATAATAAATGCAAT<br>CAATTAATATAATGTAAATGTGCCA[A/C]AAAC<br>TTCTACGTCAACATGCGGGAATTATGACAGAAAA<br>AGAAAGAGAGAAAAAAAACATG   |
| BARC-030433-06867 | 16 | 76.614 | T | C | GCP/IBP | ATATCTGCctTACTAACAACCTCCAATTTATTCTTTC<br>ACACTAGGTATTTGTCTTCTGTTT[T/C]GGAATAT<br>ACTTTATCTTGGTTCCCTTTTCAGACTTCTTCAACC<br>TGGGTTTGGATTCGCA  |
| BARC-031515-07105 | 16 | 88.501 | A | G | GCP/IBP | AGGYATAGATAAATAACCCAGTTGAACCACCACA<br>TAGGAATGATCTGCAAGGGAAAATAA[A/G]AAC<br>ACATAGATGAAGTGAGCTGGTCATAAACTTAACT<br>TAAACTCAAGCCTCATTGAACTC  |
| BARC-050393-09582 | 17 | 11.44  | T | G | GCP/IBP | CGTTAATTTTGTGTTTGAAGGCGTGGAGTGAGCAA<br>CGCTGGGTTGGGGCTCCGAAGAAGCC[T/G]CTC<br>GAATTAATCAATCACCTCAAGAAGAATCATCGGA<br>GGACAAAGCTTCCAAACACTGTT |
| BARC-043087-08524 | 17 | 21.029 | A | T | GCP/IBP | TGCTATTTTAAACTCTCATGTCCTGTCAATCTTCA<br>TGAAGTTTGATTTGTCATTTTTYW[A/T]AAAAAT<br>TAGGTTCAAAGCCGAAGAGTAAGCCCAAAAGGG<br>AGAAAACACAGGAGGAGAAAA   |

|                   |    |         |   |   |         |                                                                                                                                            |
|-------------------|----|---------|---|---|---------|--------------------------------------------------------------------------------------------------------------------------------------------|
| BARC-058841-15463 | 17 | 32.99   | A | G | GCP/IBP | CGGGGCTAGTGCTGACATTTTGCYWGASCTRCTGGGTCTAT[A/G]GAAACAAGGCCGAATGGGTTA<br>ACTGAGTCCAAAAATGTCTGATTATTAACCTGT<br>CCAAA                          |
| BARC-048381-10555 | 17 | 41.551  | A | T | GCP/IBP | ATCTAAACATTATAAAACAAAGTTCTAAAGGAATT<br>GCATGGAATTTGCTACAAAACTATA[A/T]AAAA<br>AATAAGATGCATATAAAAGAAGACATCTAGTTTG<br>AACCAAATAGTTTGATGGAGTT  |
| BARC-063551-18386 | 17 | 57.33   | T | G | GCP/IBP | TCCACGGCATTGACTGACTGTTTTCAATTGGATA<br>GGAACCAAATCAACTAATCAAGCTAG[T/G]AATA<br>AAGTGAGATTAATTTGGCAGACAAGTCTAGTTGC<br>AAATGTGAACTTTAATTTAAAA  |
| BARC-062213-17705 | 17 | 74.476  | T | C | GCP/IBP | ATGATTGCCTTATAGTTGGAAAGAGAGTTAAAA<br>GTTGAAAGGAGAAGGAAGAGAAAGAAG[T/C]C<br>ATAATTTCAAATTCTCTCACTAGCattttaataaaaatt<br>aataactaatattatctaatt |
| BARC-019787-04375 | 17 | 78.523  | A | C | GCP/IBP | CTTGTATCTGTATATGGGAAGTAATGGCAATGGC<br>CAAGCCAAAAAGAAAATGGAAAAAAA[A/C]AAG<br>AGGTTTGGGGGGTTGAAAAAAACTGGAAAAG<br>GTTAGAAGTAAAGAGAGGGGGTTGTA  |
| BARC-049255-10878 | 17 | 95.969  | A | G | GCP/IBP | TGAAGAAGCCTCGCCTCTTCGTCATTCCCAAGAT<br>CGAAATCCCCCAATTTCAATGAACTC[A/G]TTGA<br>ATTTTTAGTTTATTTTCGACTATATATTTTGGAG<br>AATTTTGAGAGTTACTATAAT   |
| BARC-048855-10738 | 17 | 109.308 | T | G | GCP/IBP | TACCATTCCAACATTAAATATCTTGAATGAGTTGT<br>TTCAAGAATAATGATATTAACCTGA[T/G]AAGTA<br>TTATTAGGATTTACGCATTTAATCAACCCACTTA<br>AACTCCTGACTCATAAGCAT   |
| BARC-039151-07458 | 17 | 116.098 | A | G | GCP/IBP | AACTTTAGTTAGTACCTATCTGCTGAAGAAGAGA<br>CCCCTGCGTTTGTGCATGTGCCTGCG[A/G]TTCC<br>TCAAAAACATGGTCAAATTAGTTAATTTAATTGA<br>GTAGAACCTAGTTAAAAGAAAT  |
| BARC-014403-01354 | 18 | 1.533   | C | G | GCP/IBP | ATCTTCCTACAATAGAGTAGTACATTTCAGTCAG<br>ACTATCCAAAAATTGTTGTGATGTTT[C/G]TGAC<br>AGTGACAACCACCGTAAAATTGCTGCTAGTTAGT<br>ACTTACACAATAATATGATGAA  |
| BARC-012295-01800 | 18 | 11.12   | A | C | GCP/IBP | AATAAACAAACGCAAGCTAGTTGCACATGATTG<br>GGAGCAGTTATTCTACTTTCATATAGT[A/C]AGG<br>TTATAATTGGTCACTTTATTAGTTACTGTGGAATT<br>TTCACGGTTCAGAAAGGATGAA  |
| BARC-046934-12799 | 18 | 26.922  | A | T | GCP/IBP | AGTATAAGGTGATGACAATTTAGTCTCTGRAARA<br>AAGAAAATTTTGA CTTGATCCCTAAA[A/T]ATGT<br>AAAAAAATATGACAATTAGGTTCTGCCATTA                              |

|                   |    |         |   |   |         |                                                                                                                                            |
|-------------------|----|---------|---|---|---------|--------------------------------------------------------------------------------------------------------------------------------------------|
| BARC-063581-18909 | 18 | 41.17   | A | G | GCP/IBP | TCCTTTGAGCGAGAATAGATGAACTTTGCATAC<br>AYATTTACAGTGCATACACAAATCA[A/G]GTCT<br>GGTTGAAAGTTCTCGAGCTCATCCATATAATCC<br>GTAAGTGAAGTAAATAGTCART     |
| BARC-047582-13000 | 18 | 48.948  | T | C | GCP/IBP | TTGATTCATGGCAARCAAAGCCAAYRGTCAAATG<br>GTGCTAAGACTGAACCTCTGCATTT[T/C]GCAA<br>GAACAATTAGAGTAACAAAATTATACCATGGATA<br>GTTGTAGCWATTATACCATGGA   |
| BARC-047516-12955 | 18 | 55.603  | T | C | GCP/IBP | ATCATAATATTTMAACCCTAATGACGAAAATTGT<br>RTCCATACTAATTTGCTTTCTATCTT[T/C]ACTTCA<br>GATGCCACAAAGTCAAACAACCAAGTAGTGGTA<br>AAAATCTATCCATGACCCCCA  |
| BARC-040163-07672 | 18 | 69.503  | C | G | GCP/IBP | AGTTGACTTAGCAGTTGAGGAAAAAAGGGAAG<br>ATTGTGGATTCTGAATTCCTCACACTAA[C/G]ATTT<br>AAACAAATTAAGATCTAACATTGGCTAATAATAA<br>AATRAAAGGacttaaaaaggtc  |
| BARC-037195-06738 | 18 | 78.278  | A | G | GCP/IBP | TCAGGTTGTATCATTTTTTTAAATTGTCTAGATGG<br>TCCTGTGGGTTATCTCTTCTATCTC[A/G]AAACTA<br>TAAAATTGTGTTCTATACAGGCTGATCAGTCAGG<br>AACTATAGTTGAAATCGTTG  |
| BARC-031343-07057 | 18 | 90.462  | A | G | GCP/IBP | CTGGTCAGGTTAAGATATCAATCTGTTATATACT<br>ACTATAATGTGAATGGCCTATATTAT[A/G]GGAA<br>GTTGCCAGATAAAATACAAAAATAATGAAAAC<br>GTAATCTACCTGCAGGGACCCAT   |
| BARC-030123-06813 | 18 | 101.849 | A | G | GCP/IBP | ATGACAATACAGATTACAGAATARTAATTTTCGTT<br>TCAAAACAAGAGTCTTTCATTAGGGT[A/G]CTAC<br>AAAGGGGGCAAAAAACCAATGAGGTGTGGAGC<br>TTTTGAAAAGGTAACGAATCAAAC |
| BARC-039375-07306 | 19 | 3.735   | A | T | GCP/IBP | GTTATAATTACTTACGGAGAAGTTTACGTGGATA<br>TGACCTTATTCTTCTTTTTTTTCAA[A/T]CATATG<br>ATTTAATCCTCTAAGAACTAATTTACGTACCAG<br>TTTTGTTTACACAATGTTT     |
| BARC-050993-10894 | 19 | 18.162  | T | C | GCP/IBP | CTAGTTTTAACTTGTCTTTATTTTACCTTTTTTCT<br>AAAGGCTTTTGGGACCTAACC[T/C]ATCAAATAG<br>GGTCTCCTTTACTTTTAATGAAAACTTTGTTTTGG<br>ATTTCCATGTTGTCTA      |
| BARC-064129-18562 | 19 | 34.396  | T | C | GCP/IBP | CAGAACCTGCTTTGTTTACAGAACCTGCTCT[T/C]AA<br>ACAAAAAATAAGTCTAACTCCATGTGTTTGGTGC<br>GAGCATGAATAACCAAATTATGAG                                   |
| BARC-042665-08342 | 19 | 46.098  | T | C | GCP/IBP | TCACAAAAAAGGAAAATCTGATTTATGTCAATG<br>CTTTTTGTTTCTCAGCTTTAGCTATA[T/C]AAGTC<br>AGACAGCAGGATGGAAGTGTGTAGAAAGATGTT<br>AGCAGAGACCAACTTTTCTTTT   |



|                   |    |         |   |   |         |                                                                                                                                            |
|-------------------|----|---------|---|---|---------|--------------------------------------------------------------------------------------------------------------------------------------------|
| BARC-059657-15973 | 19 | 56.987  | C | G | GCP/IBP | CACATTATATATACTTTTCATTGATTWTTTTTTTAC<br>ATATAAAACATTATTATCTTAACCT[C/G]AGGCTT<br>ATTAGACGAGTCATGTTTGAGATAAAGGATATCA<br>ATCTCAACCTAAGTGAGGTC |
| BARC-013061-00434 | 19 | 73.904  | T | G | GCP/IBP | TTTCCGGGGTCTCATGGCATATGAACAAT[T/G]A<br>TATTAAGTCCAATGGGTGGATTATATCAAACG<br>CATGCAAGCAACACTTTACTCGCTG                                       |
| BARC-064609-18739 | 19 | 86.302  | A | C | GCP/IBP | CTCAATCTGATTATAACCAAGCTTAGTCACAGAA<br>ACACTGGAGACACTTGAAATCCCATG[A/C]ACTC<br>CTTTGAAATGATTTACTGGAGGTATCTTCATTTCT<br>TGTGCAGCAGATATGCCCAGC  |
| BARC-014385-01342 | 19 | 100.692 | A | C | GCP/IBP | ACACATTAAGTAGCATAAAGCAGGATTGAAAAA<br>CAATTGGAGGAACAACAAATTCCTAG[A/C]GG<br>GAAACCTTCTTTTCTCCTcagcagctggggcggcagca<br>gcagcaccaccaccaccWg    |
| BARC-042281-08231 | 20 | 3.052   | A | G | GCP/IBP | CTTTTGCTGTATCAGCCTCTTTTGTTGCCTTTTCA<br>ACCCTTTCTGTACAATGTATAATG[A/G]TGATGT<br>CATTCCAACTTATCATAAAGATTAAGTCTACCAG<br>ATATATGCATTACAAAGCA    |
| BARC-052017-11314 | 20 | 19.964  | A | T | GCP/IBP | AAATTGACATTTCTCTTGTTCAAATTATGGCAA<br>TAAATTATGTTTATATATGTATTAT[A/T]GATTAT<br>ATTTAACGTTTCCACCCATTATTGGTCTTTGATG<br>GAAAATTCTTTAGAAAGTG     |
| BARC-029827-06444 | 20 | 29.561  | T | C | GCP/IBP | CCTGGATTCTTCATCTAACTACAAACCCATATTGG<br>TTAATGAAGAATACAACAAAGAGAG[T/C]TAGTT<br>AAGAGCTTCTGCAGAAAATTACCTGCATGTATTT<br>TAACTTCTCAGCAGTCAGCTC  |
| BARC-015861-02878 | 20 | 41.895  | A | T | GCP/IBP | TGCTATTGTAATCTCGAAAATAGAATTACTAAAG<br>CTCAAAATTCAGTTGGAAAATAGGCG[A/T]KTAC<br>TTGCAACTAGAGAGCTTAGGAGGTTATTAGTTAG<br>TAAATCAATTCCACTCTTGCC   |
| BARC-029803-06418 | 20 | 50.849  | T | C | GCP/IBP | AGAACCTTTTTCCAAGTTTTGAAGTCATATTCGAT<br>TTTCCTACCGTTTATAGCCATATTT[T/C]CAATGTT<br>CAGAAGAGGAAAGGTGATATTCACCGTATGTAT<br>GTACGTATGGTACATTTTCT  |
| BARC-044361-08677 | 20 | 85.381  | A | G | GCP/IBP | CAATGAAGATGTATAGGTATCTTACTGATCATCC<br>AGCTTGATTTTAGATGAGGCAAGC[A/G]CTGA<br>GAATTATCAATTTCTTTCTCATAGATATGATGAA<br>CATCAGAAGTTGTATAGAATT     |
| BARC-064735-18787 | 20 | 106.953 | T | C | GCP/IBP | TTAGTTTAGTTTGAATTTATAGATCTTTCTAGAC<br>GCATGTCATGGGACAAACCCATTTA[T/C]AATTC<br>TTGTTAGTTTTCTTGAAGACAAGataatataaaaat<br>aaatatthaGAACCTTAA    |
|                   |    |         |   |   |         |                                                                                                                                            |
