# Supplementary material
Source: MDPI journal article supplement (https://www.mdpi.com/2073-4395/11/3/604)
Supplement: s1 [file s1]

**Supplementary Table S1: Pedigree of soybean genotypes used in present study.**

| Sr. No. | Genotype     | Origin | Pedigree                   | Alternate Name (Country)                                | Source       |
|---------|--------------|--------|----------------------------|---------------------------------------------------------|--------------|
| 1       | TGx 1440-1E  | IITA   | TGx 536-02D × TGx 814-27D  | –                                                       | IITA, Ibadan |
| 2       | TGx 1448-2E  | IITA   | TGx 824-18D × TGx 814-27D  | Jenguma (Ghana), Slibean1 (Sierra leone)                | IITA, Ibadan |
| 3       | TGx 1485-1D  | IITA   | TGx 316-024D × TGx 813-11D | Sana (Mozambique)                                       | IITA, Ibadan |
| 4       | TGx 1740-2F  | IITA   | TGx 539-5E × SIBLEY        | DPSB 19 (Kenya), Tikolore (Malawi), Wamini (Mozambique) | IITA, Ibadan |
| 5       | TGx 1830-20E | IITA   | TGx 1483-3D × TGx 1448-1E  | Nangbaar (Ghana)                                        | IITA, Ibadan |
| 6       | TGx 1835-10E | IITA   | TGx 1213-1D × TGx 1445-3E  | Maksoy 1N (Uganda), SB 3 (Kenya)                        | IITA, Ibadan |
| 7       | TGx 1892-10F | IITA   | BR 839240 × TGx 1740-6F    | Afgat (Ethiopia)                                        | IITA, Ibadan |
| 8       | TGx 1895-33F | IITA   | TGx 1814-3E × TGx 1740-6F  | Wello (Ethiopia), DPSB 8 (Kenya)                        | IITA, Ibadan |
| 9*      | TGx 1904-6F  | IITA   | TGx 1802-2F × TGx 1834-5E  | Zamboane (Mozambique), Slibean4 (Sierra leone)          | IITA, Ibadan |
| 10      | TGx 1937-1F  | IITA   | TGx 1805-31F × TGx 1834-5E | Olima (Mozambique)                                      | IITA, Ibadan |
| 11      | TGx 1951-3F  | IITA   | TGx 1848-10E × TGx 1829-1E | –                                                       | IITA, Ibadan |
| 12      | TGx 1951-4F  | IITA   | TGx 1848-10E × TGx 1829-1E | Slibean2 (Sierra leone)                                 | IITA, Ibadan |
| 13      | TGx 1987-10F | IITA   | TGx 1805-31F × UG5         | –                                                       | IITA, Ibadan |
| 14*     | TGx 1987-62F | IITA   | TGx 1805-31F × UG5         | –                                                       | IITA, Ibadan |
| 15      | TGx 1988-5F  | IITA   | TGx 1740-2F × UG5          | –                                                       | IITA, Ibadan |
| 16      | TGx 1989-19F | IITA   | TGx 1440-1E × UG5          | –                                                       | IITA, Ibadan |
| 17      | TGx 1987-14F | IITA   | TGx 1805-31F × UG5         | –                                                       | IITA, Ibadan |
| 18      | TGx 1987-65F | IITA   | TGx 1805-31F × UG5         | –                                                       | IITA, Ibadan |
| 19      | TGx 1989-21F | IITA   | TGx 1440-1E × UG5          | –                                                       | IITA, Ibadan |
| 20      | TGx 1989-41F | IITA   | TGx 1440-1E × UG5          | –                                                       | IITA, Ibadan |
| 21      | TGx 1989-42F | IITA   | TGx 1440-1E × UG5          | –                                                       | IITA, Ibadan |
| 22      | TGx 1989-47F | IITA   | TGx 1440-1E × UG5          | –                                                       | IITA, Ibadan |
| 23      | TGx 1989-48F | IITA   | TGx 1440-1E × UG5          | –                                                       | IITA, Ibadan |

|     |                  |      |                           |   |              |
|-----|------------------|------|---------------------------|---|--------------|
| 24  | TGx 1990-37F     | IITA | TGx 1448-2E ×UG5          | - | IITA, Ibadan |
| 25* | TGx 1990-40F     | IITA | TGx 1448-2E ×UG5          | - | IITA, Ibadan |
| 26  | TGx 1990-73F     | IITA | TGx 1448-2E ×UG5          | - | IITA, Ibadan |
| 27  | TGx 1990-78F     | IITA | TGx 1448-2E ×UG5          | - | IITA, Ibadan |
| 28  | TGx 1990-80F     | IITA | TGx 1448-2E ×UG5          | - | IITA, Ibadan |
| 29  | TGx 1993-4FN     | IITA | TGx 1440-1E ×SOY104       | - | IITA, Ibadan |
| 30  | TGx 2001-9DM     | IITA | TGx 1987-14F ×Nasoko(MW1) | - | IITA, Ibadan |
| 31  | TGx 2002-5FM     | IITA | TGx 1740-2F ×MW1          | - | IITA, Ibadan |
| 32  | TGx 2002-33FM    | IITA | TGx 1740-2F ×MW1          | - | IITA, Ibadan |
| 33  | TGx 2004-7F      | IITA | TGx 1740-2F ×UG 5-15-3    | - | IITA, Ibadan |
| 34  | TGx 2004-9F      | IITA | TGx 1740-2F ×UG 5-15-3    | - | IITA, Ibadan |
| 35  | TGx 2004-13F     | IITA | TGx 1740-2F ×UG 5-15-3    | - | IITA, Ibadan |
| 36  | TGx 2004-13F(WF) | IITA | TGx 1740-2F ×UG 5-15-3    | - | IITA, Ibadan |
| 37  | TGx 2007-1F      | IITA | TGx 1954-1F ×UG 5         | - | IITA, Ibadan |
| 38* | TGx 2007-3F      | IITA | TGx 1954-1F ×UG 5         | - | IITA, Ibadan |
| 39  | TGx 2007-4F      | IITA | TGx 1954-1F ×UG 5         | - | IITA, Ibadan |
| 40* | TGx 2009-1F      | IITA | TGx 1983-1F ×UG 5         | - | IITA, Ibadan |
| 41  | TGx 2009-12F     | IITA | TGx 1983-1F ×UG 5         | - | IITA, Ibadan |
| 42  | TGx 2009-14F     | IITA | TGx 1983-1F ×UG 5         | - | IITA, Ibadan |
| 43  | TGx 2010-5F      | IITA | TGx 1987-14F ×MW1         | - | IITA, Ibadan |
| 44  | TGx 2010-11F     | IITA | TGx 1987-14F ×MW1         | - | IITA, Ibadan |
| 45  | TGx 2010-14F     | IITA | TGx 1987-14F ×MW1         | - | IITA, Ibadan |
| 46  | TGx 2010-15F     | IITA | TGx 1987-14F ×MW1         | - | IITA, Ibadan |
| 47  | TGx 2013-2F      | IITA | TGx 1987-37F ×TGx 1740-2F | - | IITA, Ibadan |
| 48  | TGx 2016-2E      | IITA | TGx 1987-10F ×TGx 1740-2F | - | IITA, Ibadan |
| 49  | TGx 2016-5E      | IITA | TGx 1987-10F ×TGx 1740-2F | - | IITA, Ibadan |
| 50  | TGx 2016-6E      | IITA | TGx 1987-10F ×TGx 1740-2F | - | IITA, Ibadan |
| 51  | TGx 2018-1E      | IITA | TGx 1987-11F ×MW3         | - | IITA, Ibadan |
| 52  | TGx 2018-3E      | IITA | TGx 1987-11F ×MW3         | - | IITA, Ibadan |

|     |                    |        |                             |   |                  |
|-----|--------------------|--------|-----------------------------|---|------------------|
| 53  | TGx 2018-5E        | IITA   | TGx 1987-11F × MW3          | - | IITA, Ibadan     |
| 54  | TGx 2019-1E        | IITA   | TGx 1987-11F × TGx 1740-2F  | - | IITA, Ibadan     |
| 55  | TGx 2020-1E        | IITA   | TGx 1987-62F × MW1          | - | IITA, Ibadan     |
| 56  | TGx 2020-2E        | IITA   | TGx 1987-62F × MW1          | - | IITA, Ibadan     |
| 57  | TGx 2020-4E        | IITA   | TGx 1987-62F × MW1          | - | IITA, Ibadan     |
| 58* | TGx 2022-4E        | IITA   | TGx 1987-62F × MW4          | - | IITA, Ibadan     |
| 59  | TGx 2023-1E        | IITA   | TGx 1987-62F × TGx 1740-2F  | - | IITA, Ibadan     |
| 60  | TGx 2023-4E(PF)    | IITA   | TGx 1987-62F × TGx 1740-2F  | - | IITA, Ibadan     |
| 61  | TGx 2023-4E(WF)    | IITA   | TGx 1987-62F × TGx 1740-2F  | - | IITA, Ibadan     |
| 62  | TGx 2025-6E        | IITA   | TGx 1987-9F × MW3           | - | IITA, Ibadan     |
| 63  | TGx 2025-9E        | IITA   | TGx 1987-9F × MW3           | - | IITA, Ibadan     |
| 64  | TGx 2025-13E       | IITA   | TGx 1987-9F × MW3           | - | IITA, Ibadan     |
| 65  | TGx 2025-15E       | IITA   | TGx 1987-9F × MW3           | - | IITA, Ibadan     |
| 66  | TGx 2025-16E       | IITA   | TGx 1987-9F × MW3           | - | IITA, Ibadan     |
| 67  | TGx 2025-19E       | IITA   | TGx 1987-9F × MW3           | - | IITA, Ibadan     |
| 68  | TGx 2027-2E        | IITA   | TGx 1987-9F × TGx 1740-2F   | - | IITA, Ibadan     |
| 69  | TGx 2027-3E        | IITA   | TGx 1987-9F × TGx 1740-2F   | - | IITA, Ibadan     |
| 70  | TGx 2027-4E        | IITA   | TGx 1987-9F × TGx 1740-2F   | - | IITA, Ibadan     |
| 71  | TGx 2027-8E        | IITA   | TGx 1987-9F × TGx 1740-2F   | - | IITA, Ibadan     |
| 72  | AVT2-TGx 2001-1DM  | IITA   | TGx 1987-14F × Nasoka (MW1) | - | IITA, Ibadan     |
| 73  | AVT2-TGx 2001-11DM | IITA   | TGx 1987-14F × Nasoka (MW1) | - | IITA, Ibadan     |
| 74  | AVT1-TGx 2001-24FM | IITA   | TGx 1987-14F × Nasoka (MW1) | - | IITA, Ibadan     |
| 75  | AVT2-TGx 2002-3DM  | IITA   | TGx 1740-2F × Nasoka (MW1)  | - | IITA, Ibadan     |
| 76  | AVT2-TGx 2002-14DM | IITA   | TGx 1740-2F x Nasoka (MW1)  | - | IITA, Ibadan     |
| 77  | AVT1-TGx 2002-3FM  | IITA   | TGx 1740-2F x Nasoka (MW1)  | - | IITA, Ibadan     |
| 78* | AVT2-TGx 2002-7FM  | IITA   | TGx 1740-2F x Nasoka (MW1)  | - | IITA, Ibadan     |
| 79  | AVT2-TGx 2014-16FM | IITA   | TGx 1830-20E × UG 5         | - | IITA, Ibadan     |
| 80  | AVT2-LUKANGA       | Zambia | AVT2-LUKANGA                | - | ZamSeed (Zambia) |
| 81  | ZM-551(PF)         | Malawi | PVT07-4-MAKWACHA TRIAL TALL | - | DARS (Malawi)    |

|     |            |        |                                               |                                   |                    |
|-----|------------|--------|-----------------------------------------------|-----------------------------------|--------------------|
| 82  | ZM-551(WF) | Malawi | PVT07-4-MAKWACHA TRIAL TALL                   | -                                 | DARS (Malawi)      |
| 83* | ZM-552     | Malawi | PVT07-4-MAKWACHA TRIAL SHORT                  | -                                 | DARS (Malawi)      |
| 84  | ZM-553     | Malawi | PVT07-10-NASOKO TALL                          | -                                 | DARS (Malawi)      |
| 85  | ZM-554     | Malawi | PVT07-10-NASOKO SHORT                         | -                                 | DARS (Malawi)      |
| 86  | ZM-555     | Zambia | PVT07-26-BUCK                                 | -                                 | IITA, Zambia       |
| 87  | ZM-556     | IITA   | TGx 1987-14F × Nasoko(MW1)                    | AVT1-TGX 2001-24FM(REP 1 PLOT 10) | IITA, Zambia       |
| 88  | ZM-557     | IITA   | TGx 1740-2F × Nasoko(MW1)                     | AVT1-TGX 2002-3FM                 | IITA, Zambia       |
| 89  | ZM-558     | IITA   | TGx 1987-14F × Nasoko(MW1)                    | AVT-TGX 2001-24FM                 | IITA, Zambia       |
| 90  | ZM-559     | IITA   | TGx 1987-14F × Nasoko(MW1)                    | AVT2-TGX 2001-11DM                | IITA, Zambia       |
| 91  | ZM-560     | IITA   | TGx 1740-2F × Nasoko(MW1)                     | AVT2-TGX 2002-3DM                 | IITA, Zambia       |
| 92  | ZM-561     | Zambia | AVT2-SC-SQUIRE                                | -                                 | IITA, Zambia       |
| 93  | ZM-562     | IITA   | TGx 1987-14F × Nasoko(MW1)                    | AVT2-TGX 2001-1DM                 | IITA, Zambia       |
| 94  | ZM-563     | Zambia | AVT2-SC-SAFARI                                | -                                 | IITA, Zambia       |
| 95  | ZM-564     | IITA   | TGx 1740-2F × Nasoko(MW1)                     | AVT2-TGX 2002-7FM                 | IITA, Zambia       |
| 96  | ZM-565     | IITA   | TGx 1740-2F × Nasoko(MW1)                     | AVT2-TGX 2002-14DM                | IITA, Zambia       |
| 97  | ZM-566     | Zambia | AVT-MR DINA                                   | -                                 | MRI Seeds (Zambia) |
| 98  | ZM-567     | IITA   | TGx 1830-20E × UG 5                           | AVT2-TGX 2014-16FM                | IITA, Zambia       |
| 99  | ZM-568     | Zambia | AVT2-LUKAGA                                   | -                                 | ZamSeed (Zambia)   |
| 100 | ZM-569     | IITA   | TGx 1740-2F × Nasoko(MW1)                     | AVT2-TGX 2002-14DM                | IITA, Zambia       |
| 101 | ZM-570     | Zambia | AVT3-SC-SAMBA (REP 1 PLOT 6)                  | -                                 | IITA, Zambia       |
| 102 | ZM-571     | IITA   | TGx 1740-2F × Nasoko(MW1)                     | AVT3-TGX 2002-8FM                 | IITA, Zambia       |
| 103 | ZM-572     | Zambia | AVT3-SAMBA (REP 2)                            | -                                 | IITA, Zambia       |
| 104 | ZM-573     | IITA   | TGx 1830-20E × UG 5                           | AVT3-TGX 2014-9FM                 | IITA, Zambia       |
| 105 | ZM-574     | Zambia | PANORAMA 352                                  | -                                 | IITA, Zambia       |
| 106 | ZM-575     | Zambia | (PANORAMA 29/PANORAMA 356                     | -                                 | IITA, Zambia       |
| 107 | ZM-576     | Zambia | CIMATTONAA OBV-20-2-M(2)//ST SUPREMA/SOYICA P | -                                 | IITA, Zambia       |

|     |                                           |        |                             |   |              |
|-----|-------------------------------------------|--------|-----------------------------|---|--------------|
| 108 | ZM-577                                    | Zambia | SPSOY-2005B-014-            | - | IITA, Zambia |
| 109 | ZM-578                                    | Zambia | SPSOY-2007A-068-            | - | IITA, Zambia |
| 110 | ZM-580                                    | Zambia | SPSOY-2005-000148-          | - | IITA, Zambia |
| 111 | ZIGX1001`                                 | Zambia | NA                          | - | IITA, Zambia |
| 112 | ZIGX1002                                  | Zambia | NA                          | - | IITA, Zambia |
| 113 | ZIGX1003                                  | Zambia | NA                          | - | IITA, Zambia |
| 114 | ZIGX1004                                  | Zambia | NA                          | - | IITA, Zambia |
| 115 | ZIGX1005                                  | Zambia | NA                          | - | IITA, Zambia |
| 116 | ZIGX1006                                  | Zambia | NA                          | - | IITA, Zambia |
| 117 | SPSOY-2005-000148                         | Zambia | NA                          | - | IITA, Zambia |
| 118 | SPSOY2005B-014                            | Zambia | NA                          | - | IITA, Zambia |
| 119 | SPSOY2007A-030                            | Zambia | NA                          | - | IITA, Zambia |
| 120 | SPSOY2007A-068                            | Zambia | NA                          | - | IITA, Zambia |
| 121 | SPSOY-2008A-00187                         | Zambia | NA                          | - | IITA, Zambia |
| 122 | SPSOY2008A-00213                          | Zambia | NA                          | - | IITA, Zambia |
| 123 | SPSOY-2012A-594                           | Zambia | NA                          | - | IITA, Zambia |
| 124 | ST.Suprema/Soyica.P3.Ci<br>marrona        | Zambia | NA                          | - | IITA, Zambia |
| 125 | T5-EL-LD-77-JM 17-D5                      | IITA   | NA                          | - | IITA, Ibadan |
| 126 | TGM 188                                   | NA     | NA                          | - | IITA, Ibadan |
| 127 | IITA 2019-1                               | IITA   | NA                          | - | IITA, Ibadan |
| 128 | Akinyosi                                  | NA     | NA                          | - | IITA, Ibadan |
| 129 | Cimarrona.Obv-(5Sec)-6-7-<br>M(2)2001-57) | Zambia | NA                          | - | IITA, Zambia |
| 130 | Panorama 29 /Panorama<br>356              | Zambia | NA                          | - | IITA, Zambia |
| 131 | PR165-52                                  | USA    | NA                          | - | IITA, Zambia |
| 132 | LD13-06692                                | USA    | LD07-3395 × Dairyland 75334 | - | IITA, Zambia |
| 133 | LG11-6210                                 | USA    | LG03-3020 × LG03-3780       | - | IITA, Zambia |

|      |               |                     |                                                     |             |              |
|------|---------------|---------------------|-----------------------------------------------------|-------------|--------------|
| 134  | LG12-1902     | USA                 | NA                                                  | -           | IITA, Zambia |
| 135  | LG13-2100     | USA                 | NA                                                  | -           | IITA, Zambia |
| 136  | LG13-3576     | USA                 | LG05-4229 × LG04-5187                               | -           | IITA, Zambia |
| 137  | LG13-3971     | USA                 | LG04-6000 × LG04-5187                               | -           | IITA, Zambia |
| 138* | UG 5          | Uganda              | NA                                                  | -           | IITA, Ibadan |
| 139  | MW1           | Uganda              | <i>Maksoy 1N</i>                                    | -           | IITA, Ibadan |
| 140  | MW3           | Uganda              | <i>Maksoy 3N</i>                                    | -           | IITA, Ibadan |
| 141  | MW4           | Uganda              | <i>Maksoy 4N</i>                                    | -           | IITA, Ibadan |
| 142  | CLARK         | USA                 | Lincoln2 × Richland                                 | -           | IITA, Ibadan |
| 143  | Dundee        | South Africa        | NA                                                  | -           | IITA, Ibadan |
| 144  | Ergret        | South Africa        | NA                                                  | -           | IITA, Ibadan |
| 145  | H7            | China               | NA                                                  | -           | IITA, Ibadan |
| 146  | H10           | Malawi              | NA                                                  | -           | IITA, Ibadan |
| 147  | Heron         | Canada              | T2653 × TNS                                         | -           | IITA, Ibadan |
| 148  | IBIS 2000     | South Africa        | NA                                                  | -           | IITA, Ibadan |
| 149  | Pickett       | USA                 | (D49-2491(6) × Dorman) × (Lee(4) × Peking)          | -           | IITA, Ibadan |
| 150  | Santa Rosa    | Brazil              | NA                                                  | -           | IITA, Ibadan |
| 151* | Seedco        | NA                  | NA                                                  | -           | IITA, Ibadan |
| 152  | Shelby        | USA                 | Lincoln2 × Richland                                 | -           | IITA, Ibadan |
| 153  | Solar 12      | NA                  | NA                                                  | -           | IITA, Ibadan |
| 154  | Yeluanda      | USA                 | NA                                                  | -           | IITA, Ibadan |
| 155  | PI 230970     | Japan               | NA                                                  | -           | IITA, Ibadan |
| 156  | PI 459025B    | China, Fujian Sheng | NA                                                  | Bing nan    | IITA, Ibadan |
| 157  | PI 462312     | India, Pant Nagar   | Single Plant Selection from composite of 22 crosses | Ankur       | IITA, Ibadan |
| 158  | PI 471904     | Indonesia           | NA                                                  | Orba        | IITA, Ibadan |
| 159  | PI 561356(PF) | China, Zhejiang     | NA                                                  | Jin yun dou | IITA, Ibadan |
| 160  | PI 561356(WF) | China, Zhejiang     | NA                                                  | Jin yun dou | IITA, Ibadan |
| 161  | PI 567068A    | Indonesia           | NA                                                  | MARIF 2666  | IITA, Ibadan |

|     |           |                      |                                 |            |              |
|-----|-----------|----------------------|---------------------------------|------------|--------------|
| 162 | PI 567090 | Indonesia            | NA                              | MARIF 2688 | IITA, Ibadan |
| 163 | PI 567129 | Indonesia            | NA                              | MARIF 2796 | IITA, Ibadan |
| 164 | PI 605823 | Vietnam, Ha<br>Giang | NA                              | Sample 87  | IITA, Ibadan |
| 165 | PI 635999 | Taiwan               | Selection from line GC 00138–29 | DT2000     | IITA, Ibadan |

---

Note: \* represents samples excluded from the final analysis while NA denotes Not available
