# Supplementary material
Source: MDPI journal article supplement (https://www.mdpi.com/2073-4395/11/3/604)
Supplement: s1 [file s1]

Archive with 4 entries (4 files):
- Suplementary Table S3 Population structure analysis by NJ, STRUCTURE and DAPC_revised as requested.pdf
- Supplementary Figure S1 - Chromosome frequency distribution.pdf
- Supplementary Table S1 Pedigree of soybean genotypes used in present study.pdf
- Supplementary Table S2 Details of KASP markers used in present study.pdf
