# Supplementary material
Source: MDPI journal article supplement (https://www.mdpi.com/2073-4395/11/3/604)

### Supplementary Table S3. Population structure analysis

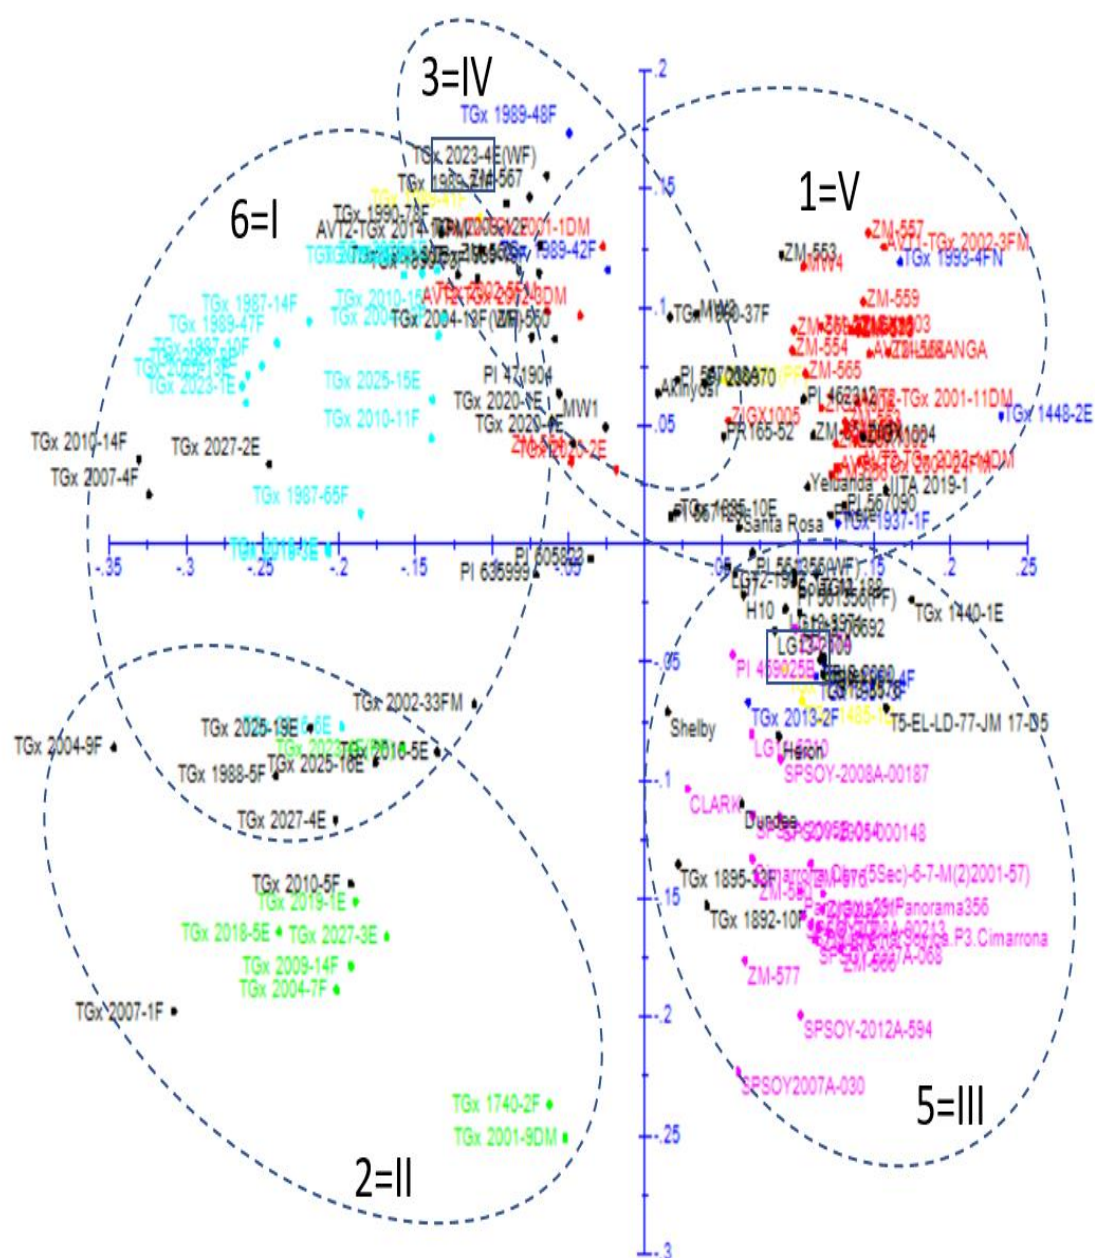

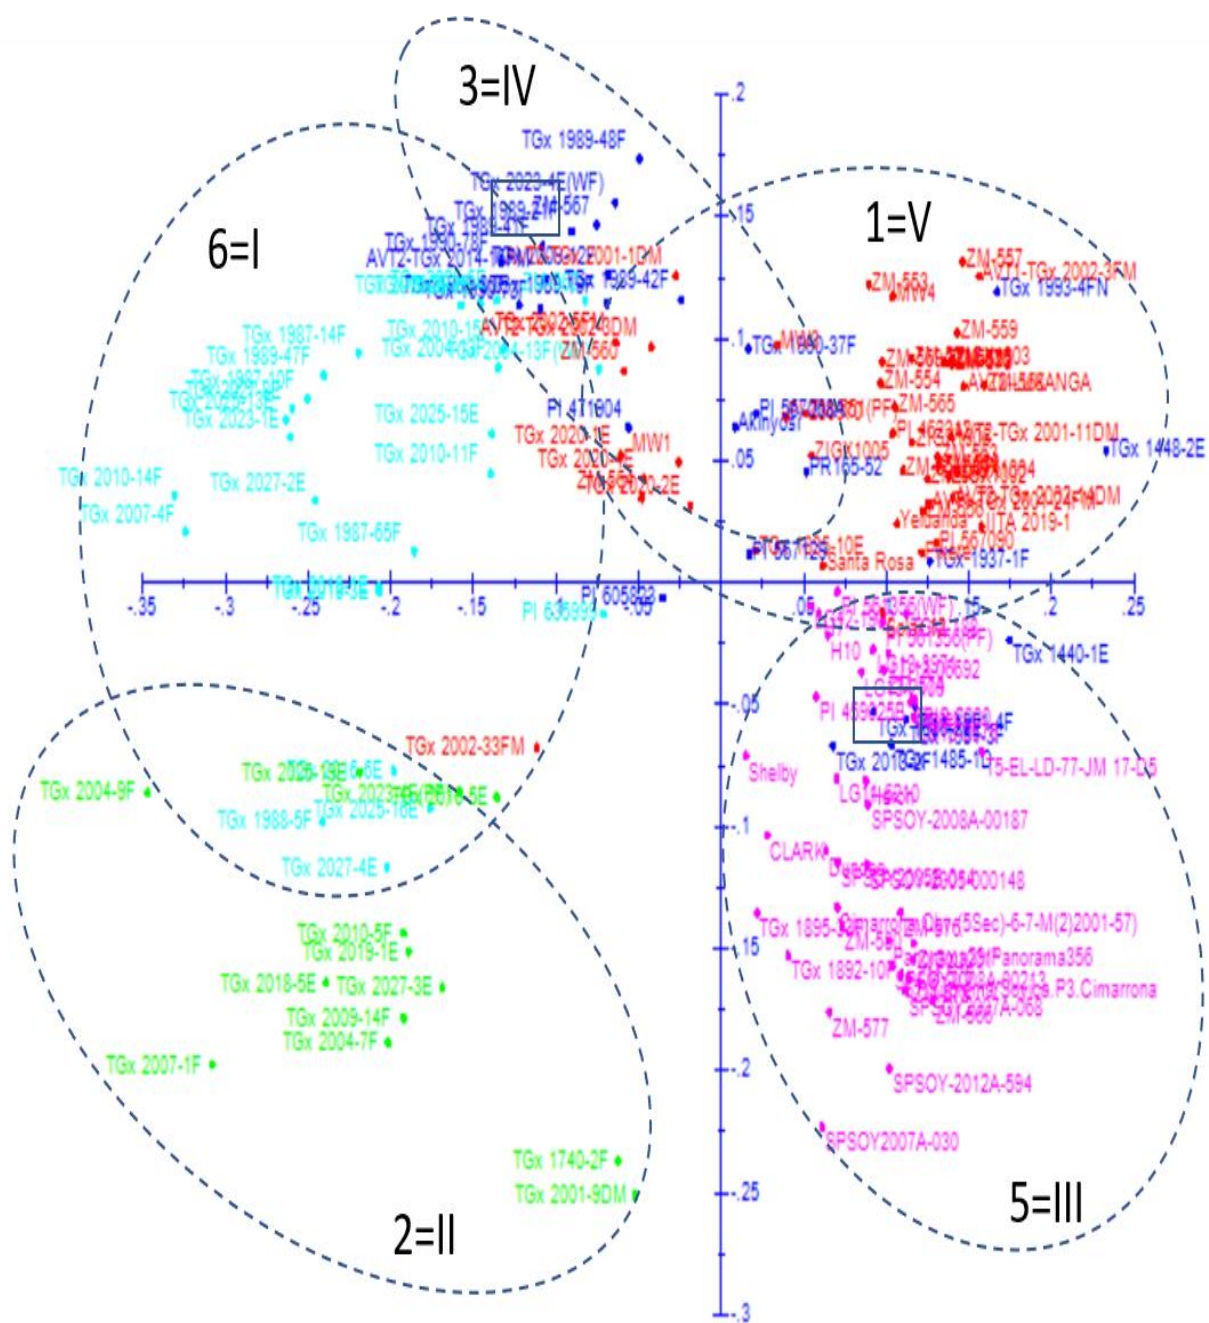

Supplement: s1 [file s1]
